# Supplementary material for: Strategies toward realization of unsupported transition metal–boron donor–acceptor complexes: an insight from theory
Source: Royal Society of Chemistry journal article supplement (doi:10.1039/c8cc02027b), 2018-01-01
Supplement: c8cc02027b1.pdf [file c8cc02027b1.pdf]

# Electronic Supplementary Information

## Strategies toward Realization of Unsupported Transition Metal-Boron Donor- Acceptor Complexes: An Insight from Theory

Bitupon Borthakur, Sandeep Das and Ashwini K. Phukan\*

*Department of Chemical Sciences  
Tezpur University  
Napaam 784028, Assam, India  
Ph : +91 (3712) 275060 (O)  
Fax: +91 (3712) 267005  
E-mail: [ashwini@tezu.ernet.in](mailto:ashwini@tezu.ernet.in)*

## TABLE OF CONTENTS

|                                                                                                                             |        |
|-----------------------------------------------------------------------------------------------------------------------------|--------|
| 1. Computational Details                                                                                                    | S2-S4  |
| 2. <b>Table S1:</b> Calculated values of bond angle around boron in <b>B1-B6</b>                                            | S5     |
| 3. <b>Table S2:</b> Calculated values of percentage contribution of platinum (% Pt) and boron (% B) in the Pt→B dative bond | S5     |
| 4. <b>Table S3:</b> Calculated values of NOCV stabilization energies                                                        | S6     |
| 5. <b>Fig. S1:</b> Bar diagrams representing the variation of BDE and preparation energies for group 13 halides             | S6     |
| 6. <b>Fig. S2:</b> Correlation plots between Pt-B bond lengths and the respective occupancies                               | S7     |
| 7. Cartesian Coordinates of all the Optimized Molecules                                                                     | S8-S46 |

**Computational Details:** Density functional theory calculations were performed to optimize all the molecules in solvent phase using the M062X meta hybrid exchange correlation functional.<sup>1</sup> We used 6-311+G\* basis set for lighter main group elements and the SDD basis set with the Stuttgart–Dresden relativistic effective core potential for indium and platinum atoms.<sup>2</sup> Solvent (dichloromethane) and dispersion effects were evaluated for these molecules using polarizable continuum model (PCM)<sup>3</sup> and D3 version of Grimme’s dispersion correction coupled with D3 damping function using the keyword “Empirical Dispersion = GD3” as implemented in Gaussian 09 suite of programs.<sup>4</sup> Frequency calculations were carried out at the same level of theory to characterize the nature of the stationary points on the potential energy surface and all of them are found to be minima with real vibrational frequencies.

In order to understand the bonding interactions between the neutral donor (**1-2**) and acceptor (**B1-B6**) fragments, we performed energy decomposition analysis (EDA) in conjunction with the natural orbital for chemical valence (NOCV) at the Gaussian optimized geometries using the Amsterdam Density Functional (ADF) program.<sup>5</sup> All these calculations were carried out at the BP86(D3)/TZ2P level of theory where dispersion corrections have been incorporated by using the Grimme’s DFT-D3-BJDAMP term.<sup>6</sup> Scalar relativistic effects were considered by applying the zero-order regular approximation (ZORA).<sup>7</sup> Core electrons (i.e., 1s for second-, [He]2s2p for third-row elements and [Kr]4d for platinum) were treated by the frozen-core approximation. EDA focuses on the instantaneous interaction energy ( $\Delta E_{\text{int}}$ ) associated with the interaction between the donor and acceptor fragments which can be divided into four components:  $\Delta E_{\text{int}} = \Delta E_{\text{elstat}} + \Delta E_{\text{Pauli}} + \Delta E_{\text{orb}} + \Delta E_{\text{disp}}$ . The  $\Delta E_{\text{elstat}}$  corresponds to the electrostatic interaction energy between the fragments calculated by means of the frozen electron density distribution of the fragments in the geometry of the molecules.  $\Delta E_{\text{Pauli}}$  refers to the repulsive

interactions between the fragments which are caused by the destabilizing interactions between occupied orbitals of both the fragments while  $\Delta E_{\text{orb}}$  refers to the stabilizing orbital interactions.

**Calculation of Preparation Energy:** The preparation energy ( $E_{\text{prep}}$ ) is calculated using the following equation:

$$E_{\text{prep}} = E_{\text{frag}}(\text{SP}) - E_{\text{frag}}(\text{eq})$$

Here,  $E_{\text{frag}}(\text{SP})$  is the single point energy of a fragment in a particular donor-acceptor complex while  $E_{\text{frag}}(\text{eq})$  is the total energy of that fragment in its equilibrium geometry.  $E_{\text{frag}}(\text{SP})$  is calculated by considering the geometry of the fragment from a particular donor-acceptor complex.

#### References:

1. Y. Zhao and D. G. Truhlar, *Theor. Chem. Acc.* 2008, **120**, 215-241.
2. (a) M. Dolg, U. Wedig, H. Stoll and H. Preuss, *J. Chem. Phys.* 1987, **86**, 866-872; (b) D. Andrae, U. Hausserermann, M. Dolg, U. Wedig, H. Stoll and H. Preuss, *Theor. Chim. Acta.*, 1990, **77**, 123-141; (c) A. Alkauskas, A. Baratoff and C. Bruder, *J. Phys. Chem. A*, 2004, **108**, 6863-6868.
3. (a) M. Cossi, G. Scalmani, N. Rega and V. Barone, *J. Chem. Phys.*, 2002, **117**, 43-54; (b) J. Tomasi and M. Persico, *Chem. Rev.*, 1994, **94**, 2027-2094.
4. M. J. Frisch, G. W. Trucks, H. B. Schlegel, G. E. Scuseria, M. A. Robb, J. R. Cheeseman, G. Scalmani, V. Barone, B. Mennucci, G. A. Petersson, H. Nakatsuji, M. Caricato, X. Li, H. P. Hratchian, A. F. Izmaylov, J. Bloino, G. Zheng, J. L. Sonnenberg, M. Hada, M. Ehara, K. Toyota, R. Fukuda, J. Hasegawa, M. Ishida, T. Nakajima, Y. Honda, O. Kitao,

H. Nakai, T. Vreven, J. A. Montgomery, Jr., J. E. Peralta, F. Ogliaro, M. Bearpark, J. J. Heyd, E. Brothers, K. N. Kudin, V. N. Staroverov, R. Kobayashi, J. Normand, K. Raghavachari, A. Rendell, J. C. Burant, S. S. Iyengar, J. Tomasi, M. Cossi, N. Rega, J. M. Millam, M. Klene, J. E. Knox, J. B. Cross, V. Bakken, C. Adamo, J. Jaramillo, R. Gomperts, R. E. Stratmann, O. Yazyev, A. J. Austin, R. Cammi, C. Pomelli, J. W. Ochterski, R. L. Martin, K. Morokuma, V. G. Zakrzewski, G. A. Voth, P. Salvador, J. J. Dannenberg, S. Dapprich, A. D. Daniels, Ö. Farkas, J. B. Foresman, J. V. Ortiz, J. Cioslowski and D. J. Fox, Gaussian 09, Revision D.01, Gaussian, Inc., Wallingford CT, **2009**.

5. (a) F. M. Bickelhaupt and E. J. Baerends, in: K. B. Lipkowitz, D. B. Boyd (Eds.), *Reviews in Computational Chemistry*, Wiley-VCH, New York, **2000**; (b) G. Te Velde, F. M. Bickelhaupt, E. J. Baerends, C. F. Guerra, S. J. A. van Gisbergen, J. G. Snijders and T. Ziegler, *J. Comput. Chem.*, 2001, **22**, 931-967; (c) K. Morokuma, *Acc. Chem. Res.*, 1977, **10**, 294-300; (d) T. Ziegler, A. Rauk and E. J. Baerends, *Theor. Chim. Acta*, 1977, **43**, 261-271.
6. S. Grimme, S. Ehrlich and L. Goerigk, *J. Comput. Chem.*, 2011, **32**, 1456-1465.
7. E. van Lenthe, E. J. Baerends and J. G. Snijders, *J. Chem. Phys.*, 1993, **99**, 4597-4610.

**Table S1:** Calculated values of bond angle around boron ( $\theta_B = 360^\circ - \Sigma(\angle EBE)$ , where E=C/O/S) in all the acceptor fragments (**B1-B6**).

| Fragment  | $\theta_B(^{\circ})$ |
|-----------|----------------------|
| <b>B1</b> | 21.0                 |
| <b>B2</b> | 13.9                 |
| <b>B3</b> | 13.8                 |
| <b>B4</b> | 14.3                 |
| <b>B5</b> | 5.7                  |
| <b>B6</b> | 8.0                  |

**Table S2:** Calculated values of percentage contribution of platinum (% Pt) and boron (% B) in the Pt→B dative bond.

| Molecule    | % Pt  | %s(Pt) | %p(Pt) | %d(Pt) | % B   | %s(B) | %p(B) |
|-------------|-------|--------|--------|--------|-------|-------|-------|
| <b>1-B1</b> | 64.75 | 47.45  | 0.97   | 51.57  | 35.25 | 21.14 | 78.70 |
| <b>1-B2</b> | 64.70 | 47.20  | 0.99   | 51.82  | 35.30 | 19.55 | 80.29 |
| <b>1-B3</b> | 64.96 | 47.45  | 1.00   | 51.55  | 35.04 | 19.38 | 80.46 |
| <b>1-B4</b> | 63.36 | 47.07  | 1.00   | 51.93  | 36.64 | 20.25 | 79.61 |
| <b>1-B5</b> | 66.94 | 46.80  | 0.96   | 52.23  | 33.06 | 20.92 | 78.80 |
| <b>1-B6</b> | 58.24 | 48.13  | 1.04   | 50.83  | 41.76 | 24.31 | 75.52 |
| <b>2-B1</b> | 64.93 | 50.57  | 0.61   | 48.82  | 35.07 | 20.86 | 78.99 |
| <b>2-B2</b> | 64.82 | 50.73  | 0.67   | 48.59  | 35.18 | 19.23 | 80.63 |
| <b>2-B3</b> | 65.28 | 50.72  | 0.65   | 48.63  | 34.72 | 18.99 | 80.86 |
| <b>2-B4</b> | 63.52 | 50.39  | 0.65   | 48.96  | 36.48 | 19.92 | 79.96 |
| <b>2-B5</b> | 65.97 | 48.01  | 0.40   | 51.59  | 34.03 | 29.49 | 70.28 |
| <b>2-B6</b> | 57.83 | 50.13  | 0.44   | 49.44  | 42.17 | 24.36 | 75.48 |

**Table S3:** Calculated (BP86(D3)/TZ2P) values of NOCV stabilization energies (in kcal mol<sup>-1</sup>) corresponding to  $\sigma$ -donation ( $E_\sigma$ ) and  $\pi$ -back donation ( $E_\pi$ ).

| Molecule    | $E_\sigma$ | $E_\pi$ | Molecule    | $E_\sigma$ | $E_\pi$ |
|-------------|------------|---------|-------------|------------|---------|
| <b>1-B1</b> | -76.0      | -3.4    | <b>2-B1</b> | -70.8      | -3.4    |
| <b>1-B2</b> | -74.7      | -3.6    | <b>2-B2</b> | -70.1      | -3.7    |
| <b>1-B3</b> | -73.5      | -3.4    | <b>2-B3</b> | -68.7      | -3.6    |
| <b>1-B4</b> | -78.1      | -3.8    | <b>2-B4</b> | -73.5      | -4.0    |
| <b>1-B5</b> | -85.6      | -5.4    | <b>2-B5</b> | -83.6      | -5.8    |
| <b>1-B6</b> | -100.5     | -7.0    | <b>2-B6</b> | -96.8      | -7.5    |

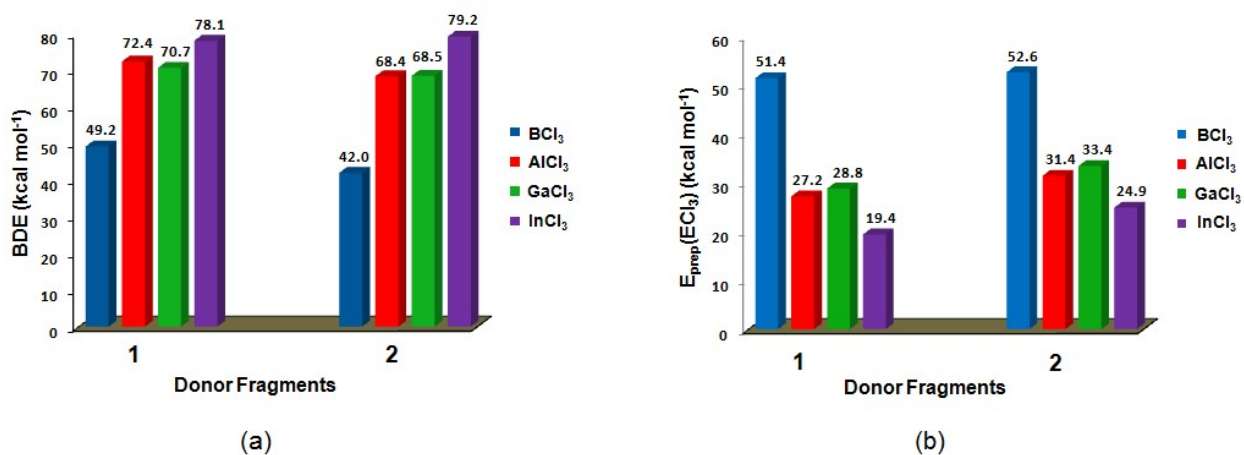

**Fig S1:** Bar diagrams representing the variation of (a) bond dissociation energies (BDE) and (b) preparation energies ( $E_{\text{prep}}(\text{ECl}_3)$ ) of group 13 halides as a function of different donor fragments.

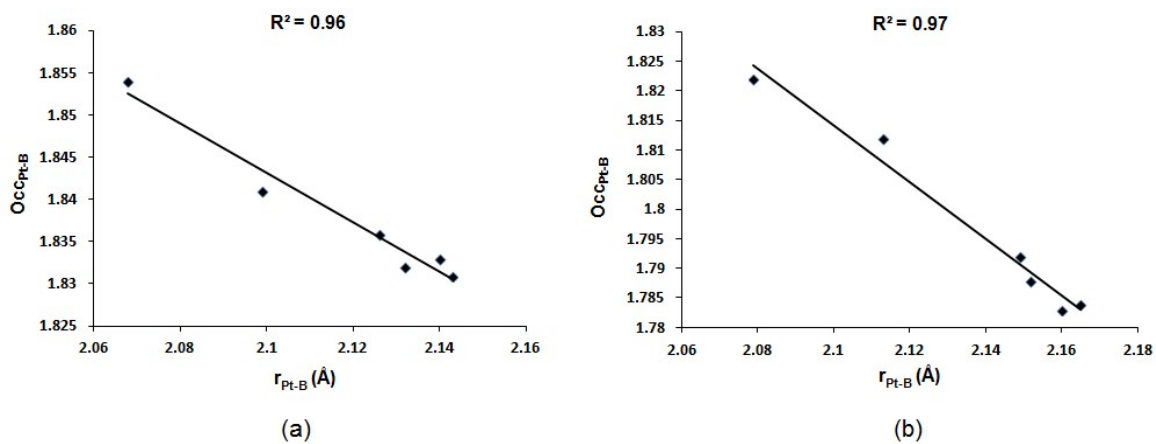

**Fig. S2:** Correlation plots between Pt-B bond lengths ( $r_{\text{Pt-B}}$ ) and the respective occupancies ( $\text{Occ}_{\text{Pt-B}}$ ) for (a) **1-Bn** and (b) **2-Bn** complexes where **Bn = B1-B6**.



Cartesian coordinates of all the complexes along with their total energies (T. E. in hartrees) including zero point vibrational correction.

**BCl<sub>3</sub>**, T. E. = -1405.554827

|    |             |              |              |
|----|-------------|--------------|--------------|
| B  | 0.000000000 | 0.000000000  | -0.000159000 |
| Cl | 0.000000000 | 0.000000000  | 1.743108000  |
| Cl | 0.000000000 | 1.510000000  | -0.871531000 |
| Cl | 0.000000000 | -1.510000000 | -0.871531000 |

**AlCl<sub>3</sub>**, T. E. = -1623.220468

|    |             |              |              |
|----|-------------|--------------|--------------|
| Cl | 0.000000000 | 0.000000000  | 2.071860000  |
| Cl | 0.000000000 | 1.794940000  | -1.035778000 |
| Cl | 0.000000000 | -1.794940000 | -1.035778000 |
| Al | 0.000000000 | 0.000000000  | -0.000397000 |

**GaCl<sub>3</sub>**, T. E. = -3305.582396

|    |             |              |              |
|----|-------------|--------------|--------------|
| Cl | 0.000000000 | 0.000000000  | -2.132197000 |
| Cl | 0.000000000 | 1.846723000  | 1.065997000  |
| Cl | 0.000000000 | -1.846723000 | 1.065997000  |
| Ga | 0.000000000 | 0.000000000  | 0.000112000  |

**InCl<sub>3</sub>**, T. E. = -1382.636034

|    |             |              |              |
|----|-------------|--------------|--------------|
| Cl | 0.000000000 | 0.000000000  | 2.293212000  |
| Cl | 0.000000000 | 1.984485000  | -1.147068000 |
| Cl | 0.000000000 | -1.984485000 | -1.147068000 |
| In | 0.000000000 | 0.000000000  | 0.000321000  |

**B1**, T. E. = -406.924805

|   |              |              |              |
|---|--------------|--------------|--------------|
| B | 0.000000000  | 0.000000000  | -1.172579000 |
| C | 0.000000000  | -1.517511000 | -0.747299000 |
| H | -0.950268000 | -2.048490000 | -0.829982000 |
| H | 0.807327000  | -2.140819000 | -1.130589000 |
| C | -1.314203000 | 0.758755000  | -0.747299000 |

|   |              |              |              |
|---|--------------|--------------|--------------|
| H | -1.298910000 | 1.847202000  | -0.829982000 |
| H | -2.257667000 | 0.371244000  | -1.130589000 |
| C | 1.314203000  | 0.758755000  | -0.747299000 |
| H | 1.450340000  | 1.769575000  | -1.130589000 |
| H | 2.249178000  | 0.201288000  | -0.829982000 |
| C | 0.000000000  | 0.000000000  | 1.110483000  |
| H | 0.000000000  | 0.000000000  | 2.197372000  |
| O | 0.983674000  | 0.901760000  | 0.680655000  |
| O | 0.289110000  | -1.302767000 | 0.680655000  |
| O | -1.272784000 | 0.401007000  | 0.680655000  |

**B2**, T. E. = -658.443935

|    |              |              |              |
|----|--------------|--------------|--------------|
| B  | 0.000000000  | 0.000000000  | -1.298727000 |
| C  | 1.224775000  | -0.959259000 | -0.950496000 |
| H  | 1.056640000  | -2.022459000 | -1.132623000 |
| H  | 2.186776000  | -0.671640000 | -1.376523000 |
| C  | -1.443130000 | -0.581057000 | -0.950496000 |
| H  | -2.279821000 | 0.096152000  | -1.132623000 |
| H  | -1.675045000 | -1.557983000 | -1.376523000 |
| C  | 0.218355000  | 1.540315000  | -0.950496000 |
| H  | -0.511731000 | 2.229623000  | -1.376523000 |
| H  | 1.223181000  | 1.926307000  | -1.132623000 |
| H  | 0.000000000  | 0.000000000  | 2.624776000  |
| O  | 0.000000000  | 1.523056000  | 0.504828000  |
| O  | 1.319006000  | -0.761528000 | 0.504828000  |
| O  | -1.319006000 | -0.761528000 | 0.504828000  |
| Si | 0.000000000  | 0.000000000  | 1.170668000  |

**B3**, T. E. = -697.739602

|   |              |              |              |
|---|--------------|--------------|--------------|
| B | 0.000000000  | 0.000000000  | -1.635741000 |
| C | 1.215646000  | -0.969350000 | -1.288921000 |
| H | 1.035386000  | -2.032276000 | -1.464770000 |
| H | 2.178259000  | -0.695147000 | -1.723719000 |
| C | -1.447305000 | -0.568105000 | -1.288921000 |
| H | -2.277696000 | 0.119467000  | -1.464770000 |
| H | -1.691144000 | -1.538854000 | -1.723719000 |

|    |              |              |              |
|----|--------------|--------------|--------------|
| C  | 0.231659000  | 1.537455000  | -1.288921000 |
| H  | -0.487115000 | 2.234001000  | -1.723719000 |
| H  | 1.242310000  | 1.912809000  | -1.464770000 |
| O  | 0.000000000  | 1.521864000  | 0.161517000  |
| O  | 1.317973000  | -0.760932000 | 0.161517000  |
| O  | -1.317973000 | -0.760932000 | 0.161517000  |
| Si | 0.000000000  | 0.000000000  | 0.846008000  |
| C  | 0.000000000  | 0.000000000  | 2.674636000  |
| H  | -0.803799000 | 0.630197000  | 3.058806000  |
| H  | -0.143867000 | -1.011208000 | 3.058806000  |
| H  | 0.947666000  | 0.381012000  | 3.058806000  |

**B4**, T. E. = -1118.107262

|    |              |              |              |
|----|--------------|--------------|--------------|
| B  | 0.000000000  | 0.000000000  | -1.906365000 |
| C  | -1.220432000 | 0.965986000  | -1.552135000 |
| H  | -1.046453000 | 2.029257000  | -1.724781000 |
| H  | -2.184283000 | 0.684262000  | -1.976602000 |
| C  | 1.446784000  | 0.573932000  | -1.552135000 |
| H  | 2.280615000  | -0.108373000 | -1.724781000 |
| H  | 1.684730000  | 1.549514000  | -1.976602000 |
| C  | -0.226352000 | -1.539918000 | -1.552135000 |
| H  | 0.499553000  | -2.233776000 | -1.976602000 |
| H  | -1.234162000 | -1.920884000 | -1.724781000 |
| O  | 0.000000000  | -1.525499000 | -0.093024000 |
| O  | -1.321121000 | 0.762749000  | -0.093024000 |
| O  | 1.321121000  | 0.762749000  | -0.093024000 |
| Si | 0.000000000  | 0.000000000  | 0.536375000  |
| Cl | 0.000000000  | 0.000000000  | 2.546925000  |

**B5**, T. E. = -407.062270

|   |              |             |              |
|---|--------------|-------------|--------------|
| B | -0.000893000 | 0.001339000 | -1.036223000 |
| C | -1.202023000 | 0.792411000 | 0.600848000  |
| H | -1.246014000 | 1.796440000 | 1.023231000  |
| H | -2.143324000 | 0.270057000 | 0.786162000  |
| C | 1.289275000  | 0.643179000 | 0.599063000  |
| H | 1.310812000  | 1.719149000 | 0.786667000  |

|   |              |              |              |
|---|--------------|--------------|--------------|
| H | 2.180861000  | 0.176259000  | 1.017952000  |
| C | -0.085441000 | -1.438460000 | 0.597607000  |
| H | -0.933389000 | -1.978998000 | 1.018357000  |
| H | 0.837417000  | -1.993468000 | 0.781245000  |
| C | 0.000771000  | -0.001233000 | 1.159652000  |
| H | 0.001301000  | -0.002365000 | 2.250935000  |
| O | 1.310492000  | 0.402872000  | -0.843343000 |
| O | -0.308830000 | -1.335088000 | -0.844093000 |
| O | -1.003999000 | 0.936072000  | -0.840870000 |

**B6**, T. E. = -1375.922367

|   |              |              |              |
|---|--------------|--------------|--------------|
| B | 0.000059000  | -0.000010000 | -1.008954000 |
| C | 1.427860000  | -0.363083000 | 1.053994000  |
| H | 1.816711000  | -1.187367000 | 1.651365000  |
| H | 2.093692000  | 0.494520000  | 1.143485000  |
| C | -1.029117000 | -1.054914000 | 1.054577000  |
| H | -0.621865000 | -2.061412000 | 1.145227000  |
| H | -1.937702000 | -0.976230000 | 1.651155000  |
| C | -0.399496000 | 1.417907000  | 1.054755000  |
| H | 0.121435000  | 2.165658000  | 1.652345000  |
| H | -1.475002000 | 1.567282000  | 1.143682000  |
| C | -0.000023000 | -0.000576000 | 1.498774000  |
| H | 0.000388000  | -0.000839000 | 2.595471000  |
| S | -1.626987000 | -0.796163000 | -0.706771000 |
| S | 1.503543000  | -1.010710000 | -0.706256000 |
| S | 0.123864000  | 1.807025000  | -0.706383000 |

**I**, T. E. = -728.574258

|    |              |              |              |
|----|--------------|--------------|--------------|
| Pt | 0.000005000  | 0.000020000  | 0.000000000  |
| C  | -2.022106000 | 0.000003000  | 0.000010000  |
| C  | -4.191586000 | 0.491140000  | -0.464656000 |
| C  | -4.191571000 | -0.491178000 | 0.464705000  |
| H  | -5.003377000 | 1.006221000  | -0.951602000 |
| H  | -5.003346000 | -1.006267000 | 0.951671000  |
| C  | -2.436550000 | 1.796931000  | -1.677666000 |
| H  | -2.870475000 | 1.606026000  | -2.659674000 |

|   |              |              |              |
|---|--------------|--------------|--------------|
| H | -2.744203000 | 2.784071000  | -1.330521000 |
| H | -1.351050000 | 1.752020000  | -1.738488000 |
| C | -2.436495000 | -1.796984000 | 1.677636000  |
| H | -2.870494000 | -1.606184000 | 2.659631000  |
| H | -2.744052000 | -2.784121000 | 1.330401000  |
| H | -1.351001000 | -1.751993000 | 1.738527000  |
| N | -2.867026000 | 0.776330000  | -0.735935000 |
| N | -2.867003000 | -0.776347000 | 0.735959000  |
| C | 2.022102000  | -0.000006000 | 0.000003000  |
| C | 4.191582000  | 0.491089000  | 0.464715000  |
| C | 4.191566000  | -0.491161000 | -0.464719000 |
| H | 5.003373000  | 1.006144000  | 0.951688000  |
| H | 5.003340000  | -1.006248000 | -0.951687000 |
| N | 2.866997000  | -0.776283000 | -0.736025000 |
| N | 2.867023000  | 0.776265000  | 0.736008000  |
| C | 2.436480000  | -1.796966000 | -1.677647000 |
| H | 2.871439000  | -1.606860000 | -2.659348000 |
| H | 2.742991000  | -2.784216000 | -1.329799000 |
| H | 1.351068000  | -1.751200000 | -1.739440000 |
| C | 2.436538000  | 1.796964000  | 1.677629000  |
| H | 2.871277000  | 1.606698000  | 2.659397000  |
| H | 2.743310000  | 2.784178000  | 1.329911000  |
| H | 1.351107000  | 1.751399000  | 1.739221000  |

2, T. E. = -1317.766007

|   |              |              |              |
|---|--------------|--------------|--------------|
| C | 1.951949000  | -0.762749000 | 0.414819000  |
| N | -2.822861000 | 0.117663000  | 0.048736000  |
| C | 2.712662000  | -1.712315000 | 1.334164000  |
| N | 2.823085000  | 0.114511000  | -0.049563000 |
| C | 4.094540000  | -1.050852000 | 1.532940000  |
| H | 4.133563000  | -0.558341000 | 2.508400000  |
| H | 4.910170000  | -1.776702000 | 1.499481000  |
| C | 4.241348000  | 0.003911000  | 0.422245000  |
| C | 2.438613000  | 1.160656000  | -0.954766000 |
| C | 1.462264000  | 3.328877000  | -1.312991000 |
| H | 0.999272000  | 4.226493000  | -0.918436000 |
| C | 1.847513000  | 2.313374000  | -0.445676000 |
| C | 1.666495000  | 3.192423000  | -2.684535000 |

|   |              |              |              |
|---|--------------|--------------|--------------|
| H | 1.362889000  | 3.984412000  | -3.359668000 |
| C | 2.251606000  | 2.034260000  | -3.187348000 |
| H | 2.398702000  | 1.917162000  | -4.255010000 |
| C | 2.639746000  | 1.014107000  | -2.322679000 |
| C | 1.973653000  | -1.887295000 | 2.661333000  |
| H | 2.556594000  | -2.527223000 | 3.331137000  |
| H | 0.994624000  | -2.342990000 | 2.499030000  |
| H | 1.818985000  | -0.923750000 | 3.153939000  |
| C | 2.815499000  | -3.070346000 | 0.624955000  |
| H | 3.378797000  | -3.770568000 | 1.248577000  |
| H | 3.322746000  | -2.988212000 | -0.339608000 |
| H | 1.819255000  | -3.480808000 | 0.446397000  |
| C | 4.723261000  | 1.348012000  | 0.961034000  |
| H | 5.712330000  | 1.222336000  | 1.407880000  |
| H | 4.044168000  | 1.724279000  | 1.729587000  |
| H | 4.801883000  | 2.094981000  | 0.167686000  |
| C | 5.148149000  | -0.458517000 | -0.718310000 |
| H | 6.159883000  | -0.609915000 | -0.334969000 |
| H | 5.200703000  | 0.289106000  | -1.512873000 |
| H | 4.798511000  | -1.399801000 | -1.147092000 |
| C | -1.953370000 | -0.760247000 | -0.417462000 |
| C | -2.716680000 | -1.709002000 | -1.335493000 |
| C | -4.098387000 | -1.046325000 | -1.531300000 |
| H | -4.138632000 | -0.552845000 | -2.506229000 |
| H | -4.914577000 | -1.771518000 | -1.497137000 |
| C | -4.242354000 | 0.007530000  | -0.419407000 |
| C | -2.436144000 | 1.161714000  | 0.955429000  |
| C | -2.628309000 | 1.008839000  | 2.323977000  |
| C | -2.237524000 | 2.026324000  | 3.190513000  |
| H | -2.377484000 | 1.904301000  | 4.258590000  |
| C | -1.658681000 | 3.188193000  | 2.688876000  |
| H | -1.352819000 | 3.978086000  | 3.365453000  |
| C | -1.463758000 | 3.331164000  | 1.316671000  |
| H | -1.005948000 | 4.231868000  | 0.923058000  |
| C | -1.851720000 | 2.318269000  | 0.447447000  |
| C | -5.145683000 | -0.455742000 | 0.723574000  |
| H | -4.795468000 | -1.397931000 | 1.149874000  |
| H | -6.158928000 | -0.605565000 | 0.343639000  |
| H | -5.194465000 | 0.290823000  | 1.519395000  |
| C | -4.726042000 | 1.351934000  | -0.955778000 |

|    |              |              |              |
|----|--------------|--------------|--------------|
| H  | -5.716361000 | 1.226367000  | -1.399873000 |
| H  | -4.049300000 | 1.728862000  | -1.726060000 |
| H  | -4.802549000 | 2.098302000  | -0.161660000 |
| C  | -2.819274000 | -3.067045000 | -0.626227000 |
| H  | -3.385055000 | -3.766434000 | -1.248529000 |
| H  | -3.323835000 | -2.984523000 | 0.339705000  |
| H  | -1.823073000 | -3.478739000 | -0.450347000 |
| C  | -1.980367000 | -1.884560000 | -2.664066000 |
| H  | -2.564806000 | -2.524430000 | -3.332616000 |
| H  | -1.001211000 | -2.340614000 | -2.503483000 |
| H  | -1.826291000 | -0.921210000 | -3.157196000 |
| H  | -3.052665000 | 0.087072000  | 2.705883000  |
| H  | -1.683321000 | 2.402401000  | -0.620653000 |
| H  | 1.672124000  | 2.392486000  | 0.621688000  |
| H  | 3.068696000  | 0.095115000  | -2.706063000 |
| Pt | -0.000547000 | -0.799296000 | -0.002151000 |

**1-BCl<sub>3</sub>**, T. E. = -2134.207539

|    |              |              |              |
|----|--------------|--------------|--------------|
| Pt | 0.001330000  | 0.012130000  | -0.620833000 |
| B  | 0.064045000  | -0.032629000 | 1.413856000  |
| Cl | 1.796480000  | -0.038904000 | 2.202591000  |
| Cl | -0.824564000 | 1.477337000  | 2.140749000  |
| Cl | -0.802850000 | -1.587737000 | 2.067082000  |
| C  | 2.022365000  | 0.017059000  | -0.757866000 |
| C  | 4.166016000  | 0.697849000  | -0.678976000 |
| C  | 4.168850000  | -0.657113000 | -0.704522000 |
| H  | 4.976244000  | 1.406613000  | -0.643159000 |
| H  | 4.981987000  | -1.363338000 | -0.696064000 |
| N  | 2.844320000  | 1.089427000  | -0.731322000 |
| N  | 2.848804000  | -1.052024000 | -0.771512000 |
| C  | 2.372323000  | 2.457743000  | -0.572423000 |
| H  | 1.588667000  | 2.659424000  | -1.299998000 |
| H  | 1.973657000  | 2.589165000  | 0.434700000  |
| H  | 3.204879000  | 3.139584000  | -0.734053000 |
| C  | 2.383383000  | -2.427722000 | -0.664602000 |
| H  | 1.599263000  | -2.605067000 | -1.398021000 |
| H  | 3.219035000  | -3.098650000 | -0.853807000 |
| H  | 1.987108000  | -2.600139000 | 0.337355000  |

|   |              |              |              |
|---|--------------|--------------|--------------|
| C | -2.061169000 | 0.013165000  | -0.596777000 |
| C | -4.215995000 | -0.657273000 | -0.616313000 |
| C | -4.212375000 | 0.695453000  | -0.589637000 |
| H | -5.028513000 | -1.364498000 | -0.629914000 |
| H | -5.021086000 | 1.407036000  | -0.574658000 |
| N | -2.894776000 | -1.054634000 | -0.628575000 |
| N | -2.889078000 | 1.085871000  | -0.586282000 |
| C | -2.480973000 | -2.449898000 | -0.682926000 |
| H | -2.819789000 | -2.972300000 | 0.210777000  |
| H | -2.902870000 | -2.919276000 | -1.571742000 |
| H | -1.395397000 | -2.484131000 | -0.722874000 |
| C | -2.467812000 | 2.479976000  | -0.586245000 |
| H | -2.888570000 | 2.986122000  | -1.455220000 |
| H | -2.803195000 | 2.968636000  | 0.327579000  |
| H | -1.382062000 | 2.510090000  | -0.626830000 |

**1-AlCl<sub>3</sub>**, T. E. = -2351.910140

|    |              |              |              |
|----|--------------|--------------|--------------|
| Pt | 0.000758000  | -0.698417000 | -0.513276000 |
| Cl | 1.836521000  | 1.512110000  | 1.960330000  |
| Cl | -0.198093000 | 3.013112000  | -0.436657000 |
| Cl | -1.626245000 | 1.325401000  | 2.252380000  |
| C  | 2.031877000  | -0.667660000 | -0.452272000 |
| C  | 4.191071000  | -0.092373000 | -0.742478000 |
| C  | 4.139695000  | -0.981664000 | 0.277989000  |
| H  | 5.023637000  | 0.417077000  | -1.198074000 |
| H  | 4.919519000  | -1.401030000 | 0.891183000  |
| N  | 2.894428000  | 0.077724000  | -1.182049000 |
| N  | 2.815012000  | -1.329942000 | 0.430605000  |
| C  | 2.502022000  | 1.032378000  | -2.210412000 |
| H  | 1.523362000  | 0.750867000  | -2.592671000 |
| H  | 2.444540000  | 2.035124000  | -1.785413000 |
| H  | 3.232773000  | 1.012501000  | -3.017614000 |
| C  | 2.297537000  | -2.170839000 | 1.500665000  |
| H  | 1.543689000  | -2.847141000 | 1.102634000  |
| H  | 3.118039000  | -2.748561000 | 1.922054000  |
| H  | 1.853138000  | -1.543879000 | 2.274856000  |
| C  | -2.033030000 | -0.647428000 | -0.433857000 |
| C  | -4.138782000 | -0.974930000 | 0.298777000  |



|    |              |              |              |
|----|--------------|--------------|--------------|
| C  | -4.197498000 | -0.088446000 | -0.723549000 |
| H  | -4.914607000 | -1.394758000 | 0.916716000  |
| H  | -5.033207000 | 0.415663000  | -1.179480000 |
| N  | -2.811414000 | -1.312172000 | 0.452422000  |
| N  | -2.901852000 | 0.094247000  | -1.161009000 |
| C  | -2.292095000 | -2.176310000 | 1.503689000  |
| H  | -1.820223000 | -1.569648000 | 2.276888000  |
| H  | -3.118296000 | -2.740422000 | 1.932362000  |
| H  | -1.562285000 | -2.865552000 | 1.083168000  |
| C  | -2.534849000 | 0.989365000  | -2.250239000 |
| H  | -3.076855000 | 0.708778000  | -3.153023000 |
| H  | -2.769923000 | 2.017865000  | -1.978952000 |
| H  | -1.463656000 | 0.902461000  | -2.415675000 |
| Al | 0.005016000  | 1.217311000  | 0.797998000  |

**1-GaCl<sub>3</sub>**, T. E. = -4034.269337

|    |              |              |              |
|----|--------------|--------------|--------------|
| Pt | -0.018441000 | -0.973218000 | 0.244124000  |
| Cl | -1.843173000 | 2.112982000  | -1.335111000 |
| Cl | 0.243358000  | 2.639084000  | 1.514595000  |
| Cl | 1.716069000  | 1.965673000  | -1.665403000 |
| C  | -2.046846000 | -0.882848000 | 0.203343000  |
| C  | -4.180843000 | -0.434798000 | 0.767900000  |
| C  | -4.173763000 | -0.815226000 | -0.532182000 |
| H  | -4.990509000 | -0.143828000 | 1.415609000  |
| H  | -4.974623000 | -0.917051000 | -1.245090000 |
| N  | -2.872388000 | -0.487758000 | 1.200361000  |
| N  | -2.862930000 | -1.096103000 | -0.853549000 |
| C  | -2.417544000 | -0.122724000 | 2.536904000  |
| H  | -1.886711000 | -0.959164000 | 2.988834000  |
| H  | -1.754923000 | 0.740652000  | 2.478887000  |
| H  | -3.285955000 | 0.124855000  | 3.143677000  |
| C  | -2.400995000 | -1.417622000 | -2.196210000 |
| H  | -1.506951000 | -2.032895000 | -2.126866000 |
| H  | -3.182645000 | -1.965067000 | -2.720139000 |
| H  | -2.169040000 | -0.497039000 | -2.733463000 |
| C  | 2.016937000  | -0.892506000 | 0.213299000  |
| C  | 4.132847000  | -0.902152000 | -0.561229000 |
| C  | 4.168003000  | -0.441006000 | 0.711543000  |

|    |             |              |              |
|----|-------------|--------------|--------------|
| H  | 4.919276000 | -1.056359000 | -1.280931000 |
| H  | 4.991409000 | -0.121562000 | 1.328175000  |
| N  | 2.813218000 | -1.182914000 | -0.842453000 |
| N  | 2.866325000 | -0.445123000 | 1.168475000  |
| C  | 2.324065000 | -1.609854000 | -2.146258000 |
| H  | 2.001144000 | -0.741575000 | -2.721328000 |
| H  | 3.126735000 | -2.124067000 | -2.671925000 |
| H  | 1.486673000 | -2.290381000 | -2.009731000 |
| C  | 2.481375000 | -0.032551000 | 2.512232000  |
| H  | 2.894587000 | -0.725994000 | 3.244808000  |
| H  | 2.850602000 | 0.973807000  | 2.705006000  |
| H  | 1.395768000 | -0.030370000 | 2.573339000  |
| Ga | 0.016718000 | 1.331176000  | -0.319864000 |

**1-InCl<sub>3</sub>**, T. E. = -2111.334729

|    |              |              |              |
|----|--------------|--------------|--------------|
| Pt | -0.000731000 | -1.108032000 | 0.352288000  |
| Cl | -1.931306000 | 1.939057000  | -1.600963000 |
| Cl | 0.028453000  | 2.782522000  | 1.528869000  |
| Cl | 1.905425000  | 1.932345000  | -1.645376000 |
| C  | -2.030730000 | -1.004741000 | 0.282366000  |
| C  | -4.182284000 | -0.475451000 | 0.696627000  |
| C  | -4.129747000 | -1.029565000 | -0.537757000 |
| H  | -5.011987000 | -0.095574000 | 1.268890000  |
| H  | -4.904804000 | -1.224274000 | -1.259997000 |
| N  | -2.891675000 | -0.473960000 | 1.183555000  |
| N  | -2.810396000 | -1.353455000 | -0.768680000 |
| C  | -2.508363000 | 0.115010000  | 2.460322000  |
| H  | -1.478631000 | -0.162278000 | 2.672793000  |
| H  | -2.580401000 | 1.201472000  | 2.402782000  |
| H  | -3.162854000 | -0.259276000 | 3.246256000  |
| C  | -2.294563000 | -1.853745000 | -2.035447000 |
| H  | -1.477870000 | -2.545692000 | -1.842901000 |
| H  | -3.093505000 | -2.371909000 | -2.562536000 |
| H  | -1.933505000 | -1.020473000 | -2.640215000 |
| C  | 2.029286000  | -1.004611000 | 0.279888000  |
| C  | 4.127953000  | -1.026683000 | -0.541123000 |
| C  | 4.182144000  | -0.483482000 | 0.698046000  |
| H  | 4.902371000  | -1.216648000 | -1.265313000 |

|    |             |              |              |
|----|-------------|--------------|--------------|
| H  | 5.012897000 | -0.110783000 | 1.273524000  |
| N  | 2.807941000 | -1.345946000 | -0.774452000 |
| N  | 2.891619000 | -0.482771000 | 1.185128000  |
| C  | 2.292375000 | -1.838676000 | -2.044419000 |
| H  | 1.937243000 | -1.001552000 | -2.647297000 |
| H  | 3.090006000 | -2.359138000 | -2.571274000 |
| H  | 1.471832000 | -2.527186000 | -1.856271000 |
| C  | 2.511574000 | 0.089743000  | 2.470414000  |
| H  | 3.155698000 | -0.309302000 | 3.252808000  |
| H  | 2.601656000 | 1.175566000  | 2.432431000  |
| H  | 1.476269000 | -0.174237000 | 2.672521000  |
| In | 0.000827000 | 1.285250000  | -0.347144000 |

**1-B1**, T. E. = -1135.588737

|    |              |              |              |
|----|--------------|--------------|--------------|
| Pt | 0.012565000  | -0.881073000 | 0.044741000  |
| C  | 2.039071000  | -0.911320000 | 0.023049000  |
| C  | 4.167495000  | -0.852776000 | -0.734717000 |
| C  | 4.216221000  | -0.796460000 | 0.617208000  |
| H  | 4.953069000  | -0.850869000 | -1.471822000 |
| H  | 5.051789000  | -0.737809000 | 1.294602000  |
| C  | 2.321472000  | -0.920474000 | -2.439844000 |
| H  | 1.853557000  | 0.042579000  | -2.648715000 |
| H  | 3.149010000  | -1.082355000 | -3.127805000 |
| H  | 1.583608000  | -1.710754000 | -2.562933000 |
| C  | 2.525350000  | -0.738218000 | 2.459432000  |
| H  | 3.025648000  | -1.513082000 | 3.039897000  |
| H  | 2.799413000  | 0.243522000  | 2.847531000  |
| H  | 1.447118000  | -0.865566000 | 2.523346000  |
| N  | 2.832966000  | -0.934369000 | -1.076829000 |
| N  | 2.909266000  | -0.842427000 | 1.059954000  |
| C  | -2.026451000 | -0.873094000 | 0.022236000  |
| C  | -4.199256000 | -0.844469000 | 0.649773000  |
| C  | -4.169368000 | -0.886818000 | -0.702247000 |
| H  | -5.026002000 | -0.812236000 | 1.339714000  |
| H  | -4.964625000 | -0.900250000 | -1.429056000 |
| N  | -2.837716000 | -0.907627000 | -1.065795000 |
| N  | -2.884938000 | -0.841174000 | 1.072724000  |
| C  | -2.375415000 | -0.944699000 | -2.445425000 |

|   |              |              |              |
|---|--------------|--------------|--------------|
| H | -2.597909000 | -1.914194000 | -2.891991000 |
| H | -2.866060000 | -0.156923000 | -3.016850000 |
| H | -1.300008000 | -0.777369000 | -2.444538000 |
| C | -2.487994000 | -0.785769000 | 2.471816000  |
| H | -2.959343000 | 0.070381000  | 2.954377000  |
| H | -2.784283000 | -1.702262000 | 2.982515000  |
| H | -1.406592000 | -0.674095000 | 2.512549000  |
| B | 0.021054000  | 1.244399000  | -0.018460000 |
| C | -0.765484000 | 1.901972000  | 1.245390000  |
| H | -1.839864000 | 1.676215000  | 1.269803000  |
| H | -0.347776000 | 1.644801000  | 2.227489000  |
| C | -0.736795000 | 1.845544000  | -1.327280000 |
| H | -0.249364000 | 1.623271000  | -2.286731000 |
| H | -1.787647000 | 1.543463000  | -1.411081000 |
| C | 1.492742000  | 1.944401000  | -0.010647000 |
| H | 2.138635000  | 1.661790000  | -0.851608000 |
| H | 2.064312000  | 1.774935000  | 0.912293000  |
| C | -0.046758000 | 3.753610000  | -0.072433000 |
| H | -0.081152000 | 4.842475000  | -0.096263000 |
| O | 1.298841000  | 3.389794000  | -0.123934000 |
| O | -0.648621000 | 3.356911000  | 1.124236000  |
| O | -0.751085000 | 3.304122000  | -1.191609000 |

**1-B2**, T. E. = -1387.107028

|    |             |              |              |
|----|-------------|--------------|--------------|
| Pt | 0.016338000 | -0.960047000 | -0.022065000 |
| C  | 2.046089000 | -1.026056000 | -0.012086000 |
| C  | 4.215042000 | -1.019967000 | -0.648259000 |
| C  | 4.189850000 | -1.080488000 | 0.703622000  |
| H  | 5.039493000 | -1.001531000 | -1.341414000 |
| H  | 4.987816000 | -1.122299000 | 1.426245000  |
| C  | 2.497521000 | -0.884144000 | -2.459706000 |
| H  | 2.959548000 | -0.003251000 | -2.906000000 |
| H  | 2.800756000 | -1.774050000 | -3.011505000 |
| H  | 1.414918000 | -0.781504000 | -2.491770000 |
| C  | 2.395963000 | -1.052426000 | 2.450461000  |
| H  | 3.061332000 | -1.648322000 | 3.073513000  |
| H  | 2.381996000 | -0.022256000 | 2.810464000  |
| H  | 1.388939000 | -1.460694000 | 2.491031000  |

|    |              |              |              |
|----|--------------|--------------|--------------|
| N  | 2.899640000  | -0.995171000 | -1.065698000 |
| N  | 2.859675000  | -1.096509000 | 1.071850000  |
| C  | -2.022430000 | -1.009591000 | -0.011383000 |
| C  | -4.183191000 | -1.120245000 | -0.673061000 |
| C  | -4.173854000 | -1.122565000 | 0.679769000  |
| H  | -4.998168000 | -1.157344000 | -1.376737000 |
| H  | -4.978855000 | -1.164630000 | 1.394628000  |
| N  | -2.849422000 | -1.058955000 | 1.064536000  |
| N  | -2.864197000 | -1.056759000 | -1.075517000 |
| C  | -2.414703000 | -1.055183000 | 2.453699000  |
| H  | -2.913894000 | -0.250831000 | 2.993818000  |
| H  | -2.650088000 | -2.011454000 | 2.921538000  |
| H  | -1.339440000 | -0.891406000 | 2.471406000  |
| C  | -2.448881000 | -1.020900000 | -2.469897000 |
| H  | -2.766297000 | -1.932751000 | -2.975863000 |
| H  | -2.887919000 | -0.155009000 | -2.965693000 |
| H  | -1.364158000 | -0.942821000 | -2.496200000 |
| B  | 0.013076000  | 1.179888000  | 0.003909000  |
| C  | -0.722142000 | 1.715898000  | 1.373074000  |
| H  | -1.764053000 | 1.385095000  | 1.452334000  |
| H  | -0.207637000 | 1.409353000  | 2.293140000  |
| C  | -0.840622000 | 1.751959000  | -1.281154000 |
| H  | -0.420927000 | 1.452402000  | -2.250126000 |
| H  | -1.891638000 | 1.440216000  | -1.266944000 |
| C  | 1.531536000  | 1.821146000  | -0.058261000 |
| H  | 2.070197000  | 1.556284000  | -0.976129000 |
| H  | 2.160849000  | 1.516937000  | 0.787197000  |
| H  | -0.122813000 | 5.292419000  | 0.063006000  |
| O  | 1.490842000  | 3.294713000  | -0.022402000 |
| O  | -0.765589000 | 3.191797000  | 1.396818000  |
| O  | -0.859567000 | 3.228574000  | -1.279221000 |
| Si | -0.069008000 | 3.828436000  | 0.040921000  |

**1-B3**, T. E. = -1426.399890

|    |              |              |              |
|----|--------------|--------------|--------------|
| Pt | 0.069880000  | -1.143749000 | -0.011571000 |
| C  | -1.966121000 | -1.290018000 | -0.001910000 |
| C  | -4.120417000 | -1.495141000 | -0.662799000 |
| C  | -4.111216000 | -1.489866000 | 0.690094000  |

|   |              |              |              |
|---|--------------|--------------|--------------|
| H | -4.932732000 | -1.569470000 | -1.366625000 |
| H | -4.913626000 | -1.561569000 | 1.405521000  |
| C | -2.391708000 | -1.326576000 | -2.459750000 |
| H | -2.669470000 | -2.251580000 | -2.965132000 |
| H | -2.867367000 | -0.480823000 | -2.956585000 |
| H | -1.311484000 | -1.201215000 | -2.485366000 |
| C | -2.356475000 | -1.336566000 | 2.463113000  |
| H | -2.894956000 | -0.555724000 | 2.999957000  |
| H | -2.542242000 | -2.301436000 | 2.935572000  |
| H | -1.291025000 | -1.118001000 | 2.478859000  |
| N | -2.805200000 | -1.378488000 | -1.065522000 |
| N | -2.790705000 | -1.368094000 | 1.074251000  |
| C | 2.099178000  | -1.108405000 | -0.001965000 |
| C | 4.261077000  | -1.020468000 | -0.656562000 |
| C | 4.248811000  | -1.051388000 | 0.696493000  |
| H | 5.078383000  | -0.977259000 | -1.357020000 |
| H | 5.053013000  | -1.034106000 | 1.413151000  |
| N | 2.923348000  | -1.117768000 | 1.076475000  |
| N | 2.942742000  | -1.061485000 | -1.062979000 |
| C | 2.474360000  | -1.052697000 | 2.458963000  |
| H | 3.117261000  | -1.676100000 | 3.079008000  |
| H | 2.508860000  | -0.022258000 | 2.816724000  |
| H | 1.450271000  | -1.414872000 | 2.506874000  |
| C | 2.520330000  | -1.024227000 | -2.455269000 |
| H | 3.122259000  | -0.293465000 | -2.994478000 |
| H | 2.637679000  | -2.005383000 | -2.916572000 |
| H | 1.473667000  | -0.727822000 | -2.485424000 |
| B | -0.022622000 | 0.997534000  | -0.012005000 |
| C | -0.917737000 | 1.522943000  | -1.287037000 |
| H | -0.502144000 | 1.233683000  | -2.261477000 |
| H | -1.953620000 | 1.164764000  | -1.254221000 |
| C | 1.464124000  | 1.704499000  | -0.100202000 |
| H | 2.118247000  | 1.432382000  | 0.737780000  |
| H | 2.001288000  | 1.453233000  | -1.023595000 |
| C | -0.760919000 | 1.510170000  | 1.362813000  |
| H | -0.220531000 | 1.229466000  | 2.276793000  |
| H | -1.785894000 | 1.132509000  | 1.459766000  |
| O | -0.866850000 | 2.979816000  | 1.377750000  |
| O | -0.999275000 | 2.994144000  | -1.292714000 |
| O | 1.358893000  | 3.171777000  | -0.073772000 |

|    |              |             |              |
|----|--------------|-------------|--------------|
| Si | -0.220935000 | 3.657343000 | 0.010667000  |
| C  | -0.368897000 | 5.495559000 | 0.026667000  |
| H  | 0.146508000  | 5.922388000 | 0.889488000  |
| H  | 0.068845000  | 5.928873000 | -0.874968000 |
| H  | -1.415429000 | 5.803782000 | 0.073614000  |

**1-B4**, T. E. = -1846.778691

|    |              |              |              |
|----|--------------|--------------|--------------|
| Pt | -1.318164000 | 0.073877000  | -0.010477000 |
| C  | -1.205691000 | 2.114037000  | -0.000971000 |
| C  | -1.108058000 | 4.266360000  | 0.688711000  |
| C  | -1.112882000 | 4.274952000  | -0.663933000 |
| H  | -1.063930000 | 5.071624000  | 1.403065000  |
| H  | -1.070924000 | 5.089113000  | -1.368263000 |
| C  | -1.208555000 | 2.513708000  | 2.465496000  |
| H  | -0.375026000 | 2.957810000  | 3.009388000  |
| H  | -2.148657000 | 2.820710000  | 2.924365000  |
| H  | -1.123021000 | 1.429731000  | 2.492126000  |
| C  | -1.187682000 | 2.541659000  | -2.461121000 |
| H  | -2.059412000 | 2.957740000  | -2.965976000 |
| H  | -0.278925000 | 2.885574000  | -2.955398000 |
| H  | -1.227168000 | 1.455050000  | -2.491642000 |
| N  | -1.169806000 | 2.942107000  | 1.074479000  |
| N  | -1.179646000 | 2.955963000  | -1.065618000 |
| C  | -1.522825000 | -1.948033000 | -0.000681000 |
| C  | -1.691675000 | -4.088338000 | 0.705840000  |
| C  | -1.682711000 | -4.107542000 | -0.647527000 |
| H  | -1.760517000 | -4.886928000 | 1.425632000  |
| H  | -1.745247000 | -4.925700000 | -1.345632000 |
| N  | -1.587425000 | -2.793612000 | -1.059038000 |
| N  | -1.606913000 | -2.762818000 | 1.081056000  |
| C  | -1.499113000 | -2.389588000 | -2.454150000 |
| H  | -0.645739000 | -2.877641000 | -2.925666000 |
| H  | -2.412302000 | -2.662357000 | -2.982960000 |
| H  | -1.363439000 | -1.310777000 | -2.484249000 |
| C  | -1.480760000 | -2.315888000 | 2.460274000  |
| H  | -2.134682000 | -2.912333000 | 3.094864000  |
| H  | -0.448224000 | -2.422715000 | 2.797069000  |
| H  | -1.768622000 | -1.268612000 | 2.511782000  |

|    |             |              |              |
|----|-------------|--------------|--------------|
| B  | 0.807849000 | -0.085008000 | -0.010884000 |
| C  | 1.434718000 | 0.749840000  | -1.285736000 |
| H  | 1.106192000 | 0.368619000  | -2.259582000 |
| H  | 1.206327000 | 1.820043000  | -1.249793000 |
| C  | 1.339006000 | -1.647675000 | -0.110700000 |
| H  | 1.007466000 | -2.272108000 | 0.726195000  |
| H  | 1.032769000 | -2.145102000 | -1.037362000 |
| C  | 1.410950000 | 0.577999000  | 1.369076000  |
| H  | 1.078192000 | 0.066396000  | 2.279931000  |
| H  | 1.168626000 | 1.640345000  | 1.472355000  |
| O  | 2.894708000 | 0.509206000  | 1.383471000  |
| O  | 2.917398000 | 0.664218000  | -1.297977000 |
| O  | 2.820621000 | -1.720380000 | -0.092886000 |
| Si | 3.413033000 | -0.198846000 | 0.001217000  |
| Cl | 5.462222000 | -0.276284000 | 0.014108000  |

**1-B5**, T. E. = -1135.702588

|    |              |              |              |
|----|--------------|--------------|--------------|
| Pt | 0.072804000  | -0.870344000 | 0.134661000  |
| C  | -1.954309000 | -0.929063000 | 0.157349000  |
| C  | -4.099882000 | -0.774845000 | 0.843439000  |
| C  | -4.115124000 | -1.060691000 | -0.480999000 |
| H  | -4.902525000 | -0.616859000 | 1.544173000  |
| H  | -4.934195000 | -1.197455000 | -1.166961000 |
| C  | -2.291102000 | -0.403294000 | 2.555882000  |
| H  | -1.468954000 | 0.305331000  | 2.471076000  |
| H  | -3.105115000 | 0.040333000  | 3.127569000  |
| H  | -1.958869000 | -1.316559000 | 3.050521000  |
| C  | -2.345099000 | -1.380803000 | -2.243143000 |
| H  | -3.215627000 | -1.425767000 | -2.895652000 |
| H  | -1.701427000 | -0.551211000 | -2.530706000 |
| H  | -1.797129000 | -2.320510000 | -2.307491000 |
| N  | -2.771811000 | -0.701123000 | 1.213118000  |
| N  | -2.797013000 | -1.157790000 | -0.877036000 |
| C  | 2.106138000  | -0.749283000 | 0.158591000  |
| C  | 4.195660000  | -0.155253000 | 0.771921000  |
| C  | 4.295202000  | -0.828990000 | -0.398498000 |
| H  | 4.950553000  | 0.295605000  | 1.394385000  |
| H  | 5.151298000  | -1.083545000 | -1.001077000 |



|   |              |              |              |
|---|--------------|--------------|--------------|
| N | 3.009094000  | -1.189713000 | -0.751989000 |
| N | 2.856690000  | -0.127673000 | 1.099319000  |
| C | 2.676239000  | -1.892180000 | -1.980855000 |
| H | 2.960601000  | -1.289233000 | -2.843459000 |
| H | 3.197382000  | -2.849059000 | -2.017891000 |
| H | 1.601049000  | -2.056016000 | -1.995080000 |
| C | 2.293742000  | 0.559648000  | 2.253858000  |
| H | 1.875403000  | -0.163906000 | 2.954154000  |
| H | 3.089203000  | 1.117129000  | 2.746154000  |
| H | 1.509258000  | 1.236023000  | 1.915828000  |
| B | -0.099312000 | 1.184879000  | -0.256025000 |
| C | -0.525642000 | 3.250998000  | 0.837995000  |
| H | -1.443320000 | 3.702159000  | 1.234047000  |
| H | 0.321401000  | 3.635401000  | 1.427154000  |
| C | -1.374065000 | 2.797453000  | -1.438216000 |
| H | -2.382802000 | 2.965538000  | -1.032462000 |
| H | -1.378310000 | 3.110340000  | -2.489315000 |
| C | 1.043830000  | 3.105044000  | -1.059241000 |
| H | 1.828191000  | 3.733599000  | -0.619740000 |
| H | 1.150542000  | 3.150527000  | -2.153134000 |
| C | -0.342696000 | 3.604164000  | -0.641973000 |
| H | -0.453184000 | 4.678693000  | -0.815368000 |
| O | -1.036266000 | 1.418554000  | -1.370963000 |
| O | 1.213112000  | 1.772890000  | -0.597939000 |
| O | -0.618302000 | 1.838378000  | 0.966315000  |

**1-B6**, T. E. = -2104.596027

|    |              |              |              |
|----|--------------|--------------|--------------|
| Pt | -0.016171000 | -1.066287000 | 0.003846000  |
| C  | 2.004921000  | -1.210855000 | 0.021425000  |
| C  | 4.159769000  | -1.300071000 | -0.626440000 |
| C  | 4.144457000  | -1.203012000 | 0.725567000  |
| H  | 4.979359000  | -1.365791000 | -1.322184000 |
| H  | 4.948228000  | -1.168749000 | 1.441711000  |
| C  | 2.402387000  | -1.256998000 | -2.420203000 |
| H  | 2.106997000  | -0.233556000 | -2.657944000 |
| H  | 3.222220000  | -1.567251000 | -3.065497000 |
| H  | 1.553097000  | -1.922288000 | -2.561816000 |
| C  | 2.336973000  | -0.954336000 | 2.461024000  |

|   |              |              |              |
|---|--------------|--------------|--------------|
| H | 3.190216000  | -0.952435000 | 3.136445000  |
| H | 1.816243000  | 0.002608000  | 2.514197000  |
| H | 1.654623000  | -1.756333000 | 2.738970000  |
| N | 2.843159000  | -1.319872000 | -1.034410000 |
| N | 2.818542000  | -1.162041000 | 1.101400000  |
| C | -2.068852000 | -1.046948000 | 0.016260000  |
| C | -4.228675000 | -1.089657000 | -0.638621000 |
| C | -4.216426000 | -1.058898000 | 0.714233000  |
| H | -5.046214000 | -1.112721000 | -1.339823000 |
| H | -5.020451000 | -1.048803000 | 1.431254000  |
| N | -2.890363000 | -1.043899000 | 1.095329000  |
| N | -2.910758000 | -1.093092000 | -1.044698000 |
| C | -2.457674000 | -1.034499000 | 2.485477000  |
| H | -2.808257000 | -0.127748000 | 2.976657000  |
| H | -2.852297000 | -1.913034000 | 2.996445000  |
| H | -1.370288000 | -1.051688000 | 2.505803000  |
| C | -2.502728000 | -1.130204000 | -2.440963000 |
| H | -2.865068000 | -2.048101000 | -2.904822000 |
| H | -2.902142000 | -0.262995000 | -2.964727000 |
| H | -1.416263000 | -1.099348000 | -2.479888000 |
| B | 0.069779000  | 1.000035000  | -0.039663000 |
| C | -1.063924000 | 3.447818000  | -0.985800000 |
| H | -1.056339000 | 4.070216000  | -1.882649000 |
| H | -2.032387000 | 3.573191000  | -0.495603000 |
| C | 1.440467000  | 3.471745000  | -0.539494000 |
| H | 1.493633000  | 3.613046000  | -1.621667000 |
| H | 2.207937000  | 4.097211000  | -0.079184000 |
| C | -0.194068000 | 3.452048000  | 1.412102000  |
| H | -0.979893000 | 4.065772000  | 1.856778000  |
| H | 0.717491000  | 3.594436000  | 1.997528000  |
| C | 0.055049000  | 3.891460000  | -0.036392000 |
| H | 0.042786000  | 4.989474000  | -0.034069000 |
| S | -0.752245000 | 1.704905000  | 1.576631000  |
| S | -0.912551000 | 1.704978000  | -1.562857000 |
| S | 1.879490000  | 1.731483000  | -0.138775000 |

**2-BCl<sub>3</sub>**, T. E. = -2723.387794

|   |              |              |              |
|---|--------------|--------------|--------------|
| C | 1.983953000  | -0.656963000 | -0.536337000 |
| N | -2.802446000 | 0.494481000  | -0.454184000 |
| C | 2.816750000  | -1.811106000 | -1.078197000 |
| N | 2.783239000  | 0.369016000  | -0.389627000 |
| C | 4.256229000  | -1.436875000 | -0.691609000 |
| H | 4.514376000  | -1.934967000 | 0.246760000  |
| H | 4.982410000  | -1.746140000 | -1.446359000 |
| C | 4.266453000  | 0.085503000  | -0.483213000 |
| C | 2.365993000  | 1.713917000  | -0.087863000 |
| C | 1.720558000  | 3.397309000  | 1.496717000  |
| H | 1.427654000  | 3.674248000  | 2.503044000  |
| C | 1.995461000  | 2.065043000  | 1.206499000  |
| C | 1.827068000  | 4.370437000  | 0.506824000  |
| H | 1.623349000  | 5.409180000  | 0.742486000  |
| C | 2.162593000  | 4.005399000  | -0.792123000 |
| H | 2.218800000  | 4.754181000  | -1.574298000 |
| C | 2.423720000  | 2.672547000  | -1.095611000 |
| C | 2.431613000  | -3.194211000 | -0.571871000 |
| H | 3.108127000  | -3.934299000 | -1.010339000 |
| H | 1.409345000  | -3.446087000 | -0.857922000 |
| H | 2.502188000  | -3.259349000 | 0.513677000  |
| C | 2.593103000  | -1.772141000 | -2.604504000 |
| H | 3.209451000  | -2.539988000 | -3.079113000 |
| H | 2.852668000  | -0.805018000 | -3.039876000 |
| H | 1.545630000  | -1.979457000 | -2.839238000 |
| C | 4.919147000  | 0.479418000  | 0.839433000  |
| H | 5.957760000  | 0.140378000  | 0.837108000  |
| H | 4.401872000  | 0.008205000  | 1.678262000  |
| H | 4.914613000  | 1.562034000  | 0.984468000  |
| C | 4.926809000  | 0.840657000  | -1.635509000 |
| H | 5.967054000  | 0.516007000  | -1.707526000 |
| H | 4.928371000  | 1.917693000  | -1.462790000 |
| H | 4.443620000  | 0.637630000  | -2.592605000 |
| C | -2.111627000 | -0.615801000 | -0.462148000 |
| C | -3.055025000 | -1.746431000 | -0.863551000 |
| C | -4.265167000 | -1.011683000 | -1.473795000 |
| H | -4.147521000 | -0.944659000 | -2.559476000 |
| H | -5.207013000 | -1.525194000 | -1.271873000 |
| C | -4.249300000 | 0.402964000  | -0.879811000 |
| C | -2.285633000 | 1.781135000  | -0.070240000 |

|    |              |              |              |
|----|--------------|--------------|--------------|
| C  | -2.494762000 | 2.241098000  | 1.223590000  |
| C  | -2.094545000 | 3.531230000  | 1.560998000  |
| H  | -2.251538000 | 3.894401000  | 2.570094000  |
| C  | -1.495762000 | 4.347657000  | 0.608474000  |
| H  | -1.187978000 | 5.352783000  | 0.873833000  |
| C  | -1.271183000 | 3.869597000  | -0.680174000 |
| H  | -0.785625000 | 4.498028000  | -1.417451000 |
| C  | -1.664952000 | 2.582306000  | -1.024086000 |
| C  | -5.170500000 | 0.590712000  | 0.326007000  |
| H  | -4.930291000 | -0.093124000 | 1.140082000  |
| H  | -6.201961000 | 0.409229000  | 0.016823000  |
| H  | -5.111550000 | 1.612317000  | 0.706477000  |
| C  | -4.559295000 | 1.465313000  | -1.929902000 |
| H  | -5.566897000 | 1.290814000  | -2.314401000 |
| H  | -3.861096000 | 1.408014000  | -2.767690000 |
| H  | -4.525039000 | 2.473199000  | -1.511545000 |
| C  | -3.478275000 | -2.540275000 | 0.384201000  |
| H  | -4.201050000 | -3.302457000 | 0.078993000  |
| H  | -3.948596000 | -1.907246000 | 1.136509000  |
| H  | -2.627993000 | -3.033344000 | 0.846805000  |
| C  | -2.385344000 | -2.691927000 | -1.860315000 |
| H  | -3.106039000 | -3.439798000 | -2.203504000 |
| H  | -1.543677000 | -3.208233000 | -1.392805000 |
| H  | -2.015773000 | -2.150390000 | -2.735701000 |
| H  | -2.958320000 | 1.590880000  | 1.955024000  |
| H  | -1.507964000 | 2.197187000  | -2.026219000 |
| H  | 1.934812000  | 1.298632000  | 1.969606000  |
| H  | 2.681626000  | 2.376651000  | -2.106048000 |
| B  | 0.045676000  | -1.519032000 | 1.516044000  |
| Pt | -0.041753000 | -0.656654000 | -0.332286000 |
| Cl | -1.265303000 | -0.768779000 | 2.662795000  |
| Cl | -0.240159000 | -3.390506000 | 1.470531000  |
| Cl | 1.715843000  | -1.299025000 | 2.417864000  |

**2-AlCl<sub>3</sub>**, T. E. = -2941.095477

|   |              |              |              |
|---|--------------|--------------|--------------|
| C | 2.041659000  | -0.580865000 | -0.568183000 |
| N | -2.812740000 | 0.479473000  | -0.440609000 |
| C | 2.921854000  | -1.745274000 | -0.999791000 |

|   |              |              |              |
|---|--------------|--------------|--------------|
| N | 2.818076000  | 0.446810000  | -0.347901000 |
| C | 4.332226000  | -1.336213000 | -0.540786000 |
| H | 4.547629000  | -1.809350000 | 0.420987000  |
| H | 5.105113000  | -1.646014000 | -1.247130000 |
| C | 4.306598000  | 0.189439000  | -0.362718000 |
| C | 2.355325000  | 1.789912000  | -0.112988000 |
| C | 1.697689000  | 3.537261000  | 1.392959000  |
| H | 1.439784000  | 3.865952000  | 2.393110000  |
| C | 2.034347000  | 2.205289000  | 1.174725000  |
| C | 1.693855000  | 4.443421000  | 0.336524000  |
| H | 1.439300000  | 5.482321000  | 0.515141000  |
| C | 1.989331000  | 4.012287000  | -0.952478000 |
| H | 1.964191000  | 4.709604000  | -1.782193000 |
| C | 2.315135000  | 2.679260000  | -1.182603000 |
| C | 2.510423000  | -3.096567000 | -0.430290000 |
| H | 3.201225000  | -3.864242000 | -0.791412000 |
| H | 1.500678000  | -3.366980000 | -0.743940000 |
| H | 2.541468000  | -3.098557000 | 0.660232000  |
| C | 2.793682000  | -1.795802000 | -2.535484000 |
| H | 3.452981000  | -2.574184000 | -2.927871000 |
| H | 3.063455000  | -0.848365000 | -3.006872000 |
| H | 1.767478000  | -2.037780000 | -2.824679000 |
| C | 4.902384000  | 0.622140000  | 0.973865000  |
| H | 5.946731000  | 0.303607000  | 1.013437000  |
| H | 4.365601000  | 0.155655000  | 1.802807000  |
| H | 4.873199000  | 1.706931000  | 1.097076000  |
| C | 4.983291000  | 0.941308000  | -1.507512000 |
| H | 6.042242000  | 0.674607000  | -1.520606000 |
| H | 4.913796000  | 2.021994000  | -1.372023000 |
| H | 4.557257000  | 0.681345000  | -2.478015000 |
| C | -2.031636000 | -0.523662000 | -0.737495000 |
| C | -2.880551000 | -1.636208000 | -1.337403000 |
| C | -4.258066000 | -0.979751000 | -1.564246000 |
| H | -4.360776000 | -0.687324000 | -2.612819000 |
| H | -5.082359000 | -1.653499000 | -1.325178000 |
| C | -4.289678000 | 0.277156000  | -0.684181000 |
| C | -2.356154000 | 1.761103000  | 0.028161000  |
| C | -2.571272000 | 2.158156000  | 1.341984000  |
| C | -2.222119000 | 3.450171000  | 1.727657000  |
| H | -2.380669000 | 3.760794000  | 2.753925000  |

|    |              |              |              |
|----|--------------|--------------|--------------|
| C  | -1.674445000 | 4.334629000  | 0.805660000  |
| H  | -1.407552000 | 5.340433000  | 1.110313000  |
| C  | -1.451286000 | 3.923015000  | -0.505622000 |
| H  | -1.011537000 | 4.604763000  | -1.224161000 |
| C  | -1.788113000 | 2.633485000  | -0.896974000 |
| C  | -5.004820000 | 0.055112000  | 0.648573000  |
| H  | -4.520702000 | -0.726913000 | 1.236442000  |
| H  | -6.036981000 | -0.242284000 | 0.451598000  |
| H  | -5.031650000 | 0.970158000  | 1.242558000  |
| C  | -4.879739000 | 1.479063000  | -1.412075000 |
| H  | -5.913971000 | 1.251562000  | -1.680475000 |
| H  | -4.327564000 | 1.694328000  | -2.329806000 |
| H  | -4.880332000 | 2.373199000  | -0.785140000 |
| C  | -2.953925000 | -2.818817000 | -0.364165000 |
| H  | -3.653801000 | -3.561916000 | -0.755378000 |
| H  | -3.291725000 | -2.516851000 | 0.630019000  |
| H  | -1.978326000 | -3.290814000 | -0.256505000 |
| C  | -2.255118000 | -2.107392000 | -2.653472000 |
| H  | -2.901729000 | -2.855988000 | -3.120007000 |
| H  | -1.275369000 | -2.558787000 | -2.477171000 |
| H  | -2.134076000 | -1.279062000 | -3.357095000 |
| H  | -2.985395000 | 1.460921000  | 2.056778000  |
| H  | -1.634872000 | 2.300684000  | -1.918358000 |
| H  | 2.055972000  | 1.488275000  | 1.986689000  |
| H  | 2.549394000  | 2.328681000  | -2.181819000 |
| Pt | 0.005533000  | -0.541505000 | -0.599835000 |
| Cl | -1.718452000 | -0.861920000 | 2.767044000  |
| Cl | -0.171338000 | -3.708329000 | 1.664803000  |
| Cl | 1.770033000  | -1.092853000 | 2.705220000  |
| Al | -0.039725000 | -1.520051000 | 1.525713000  |

**2-GaCl<sub>3</sub>**, T. E. = -4623.457568

|   |              |              |              |
|---|--------------|--------------|--------------|
| C | 2.044558000  | -0.473258000 | -0.680730000 |
| N | -2.802130000 | 0.604600000  | -0.486861000 |
| C | 2.914628000  | -1.627218000 | -1.155627000 |
| N | 2.827781000  | 0.528722000  | -0.386425000 |
| C | 4.324675000  | -1.257524000 | -0.661660000 |
| H | 4.526944000  | -1.782544000 | 0.275609000  |

|   |              |              |              |
|---|--------------|--------------|--------------|
| H | 5.101311000  | -1.537186000 | -1.376433000 |
| C | 4.313858000  | 0.256972000  | -0.403285000 |
| C | 2.371578000  | 1.857864000  | -0.073102000 |
| C | 1.702692000  | 3.507210000  | 1.534637000  |
| H | 1.432931000  | 3.771904000  | 2.550656000  |
| C | 2.033431000  | 2.189884000  | 1.234646000  |
| C | 1.721077000  | 4.480444000  | 0.539542000  |
| H | 1.471390000  | 5.507695000  | 0.781611000  |
| C | 2.031914000  | 4.132394000  | -0.770609000 |
| H | 2.023032000  | 4.882790000  | -1.553053000 |
| C | 2.353255000  | 2.815005000  | -1.082988000 |
| C | 2.476678000  | -2.995694000 | -0.648504000 |
| H | 3.159762000  | -3.757994000 | -1.034537000 |
| H | 1.466895000  | -3.237745000 | -0.985186000 |
| H | 2.496705000  | -3.045502000 | 0.441401000  |
| C | 2.804771000  | -1.609841000 | -2.693071000 |
| H | 3.453891000  | -2.383461000 | -3.110823000 |
| H | 3.099308000  | -0.648710000 | -3.119713000 |
| H | 1.777872000  | -1.818906000 | -3.004934000 |
| C | 4.906726000  | 0.614803000  | 0.956305000  |
| H | 5.948508000  | 0.286626000  | 0.982892000  |
| H | 4.364017000  | 0.110997000  | 1.758937000  |
| H | 4.886034000  | 1.692101000  | 1.134597000  |
| C | 5.002710000  | 1.061608000  | -1.504169000 |
| H | 6.057980000  | 0.781885000  | -1.530983000 |
| H | 4.947425000  | 2.133877000  | -1.308503000 |
| H | 4.574224000  | 0.862428000  | -2.487982000 |
| C | -2.024870000 | -0.372779000 | -0.865374000 |
| C | -2.878506000 | -1.448434000 | -1.521015000 |
| C | -4.265810000 | -0.788586000 | -1.671312000 |
| H | -4.399755000 | -0.436113000 | -2.697492000 |
| H | -5.079092000 | -1.481649000 | -1.450426000 |
| C | -4.282492000 | 0.414062000  | -0.717552000 |
| C | -2.333546000 | 1.852606000  | 0.054771000  |
| C | -2.515694000 | 2.163535000  | 1.396635000  |
| C | -2.154185000 | 3.427775000  | 1.855808000  |
| H | -2.287943000 | 3.671173000  | 2.903490000  |
| C | -1.625202000 | 4.369271000  | 0.980572000  |
| H | -1.348811000 | 5.352789000  | 1.343559000  |
| C | -1.430906000 | 4.041940000  | -0.358887000 |

|    |              |              |              |
|----|--------------|--------------|--------------|
| H  | -1.002822000 | 4.766358000  | -1.041983000 |
| C  | -1.782660000 | 2.781767000  | -0.824884000 |
| C  | -4.974837000 | 0.111590000  | 0.611042000  |
| H  | -4.487007000 | -0.710524000 | 1.137699000  |
| H  | -6.012957000 | -0.164532000 | 0.413908000  |
| H  | -4.982894000 | 0.986873000  | 1.262927000  |
| C  | -4.883666000 | 1.656762000  | -1.363224000 |
| H  | -5.922413000 | 1.445561000  | -1.626914000 |
| H  | -4.346253000 | 1.923801000  | -2.276038000 |
| H  | -4.872106000 | 2.512748000  | -0.685355000 |
| C  | -2.919212000 | -2.694781000 | -0.628745000 |
| H  | -3.620281000 | -3.418221000 | -1.053193000 |
| H  | -3.238406000 | -2.464171000 | 0.390648000  |
| H  | -1.937462000 | -3.164174000 | -0.573139000 |
| C  | -2.279016000 | -1.820835000 | -2.879974000 |
| H  | -2.928642000 | -2.542329000 | -3.383311000 |
| H  | -1.291251000 | -2.273246000 | -2.757816000 |
| H  | -2.182668000 | -0.943883000 | -3.526124000 |
| H  | -2.911233000 | 1.420671000  | 2.075520000  |
| H  | -1.655288000 | 2.517048000  | -1.869490000 |
| H  | 2.039323000  | 1.420848000  | 1.998419000  |
| H  | 2.600239000  | 2.529419000  | -2.099704000 |
| Pt | 0.009776000  | -0.400789000 | -0.740372000 |
| Cl | -1.796902000 | -0.971721000 | 2.698737000  |
| Cl | -0.209635000 | -3.804783000 | 1.420869000  |
| Cl | 1.785138000  | -1.192759000 | 2.638487000  |
| Ga | -0.064855000 | -1.543232000 | 1.358717000  |

**2-InCl<sub>3</sub>**, T. E. = -2700.528260

|   |              |              |              |
|---|--------------|--------------|--------------|
| C | 2.049591000  | -0.359131000 | -0.795127000 |
| N | -2.799139000 | 0.731053000  | -0.540163000 |
| C | 2.895092000  | -1.508392000 | -1.321803000 |
| N | 2.851635000  | 0.596309000  | -0.412655000 |
| C | 4.312240000  | -1.196750000 | -0.805291000 |
| H | 4.504724000  | -1.783789000 | 0.096535000  |
| H | 5.084508000  | -1.444374000 | -1.536446000 |
| C | 4.331065000  | 0.298523000  | -0.451398000 |
| C | 2.414072000  | 1.909376000  | -0.016446000 |



|   |              |              |              |
|---|--------------|--------------|--------------|
| C | 1.803334000  | 3.473600000  | 1.695005000  |
| H | 1.576623000  | 3.688783000  | 2.733028000  |
| C | 2.138137000  | 2.176452000  | 1.320314000  |
| C | 1.762351000  | 4.490350000  | 0.745274000  |
| H | 1.507875000  | 5.500974000  | 1.044894000  |
| C | 2.023012000  | 4.208423000  | -0.591822000 |
| H | 1.971498000  | 4.994912000  | -1.336226000 |
| C | 2.345648000  | 2.911630000  | -0.978955000 |
| C | 2.417990000  | -2.884037000 | -0.867860000 |
| H | 3.073625000  | -3.651850000 | -1.288460000 |
| H | 1.398560000  | -3.083459000 | -1.205606000 |
| H | 2.449316000  | -2.982059000 | 0.219625000  |
| C | 2.789378000  | -1.425340000 | -2.856289000 |
| H | 3.424769000  | -2.192341000 | -3.306022000 |
| H | 3.102717000  | -0.452380000 | -3.240411000 |
| H | 1.759174000  | -1.601531000 | -3.177833000 |
| C | 4.943432000  | 0.561129000  | 0.920796000  |
| H | 5.978905000  | 0.213031000  | 0.914518000  |
| H | 4.400639000  | 0.019216000  | 1.697903000  |
| H | 4.946162000  | 1.625706000  | 1.164474000  |
| C | 5.018450000  | 1.160083000  | -1.509331000 |
| H | 6.073034000  | 0.880748000  | -1.557163000 |
| H | 4.964933000  | 2.220435000  | -1.255336000 |
| H | 4.583243000  | 1.014764000  | -2.499745000 |
| C | -2.009436000 | -0.198642000 | -1.004034000 |
| C | -2.850998000 | -1.242538000 | -1.721655000 |
| C | -4.252825000 | -0.602456000 | -1.804357000 |
| H | -4.407720000 | -0.182122000 | -2.801581000 |
| H | -5.049170000 | -1.326044000 | -1.622733000 |
| C | -4.278594000 | 0.530555000  | -0.767510000 |
| C | -2.335581000 | 1.936906000  | 0.093464000  |
| C | -2.496759000 | 2.132462000  | 1.459678000  |
| C | -2.117016000 | 3.349653000  | 2.019960000  |
| H | -2.231586000 | 3.503291000  | 3.086835000  |
| C | -1.591490000 | 4.358203000  | 1.220634000  |
| H | -1.298955000 | 5.304043000  | 1.662717000  |
| C | -1.422913000 | 4.146899000  | -0.145349000 |
| H | -0.998781000 | 4.924498000  | -0.769829000 |
| C | -1.793830000 | 2.934679000  | -0.713143000 |
| C | -4.950236000 | 0.120095000  | 0.542581000  |

|    |              |              |              |
|----|--------------|--------------|--------------|
| H  | -4.449028000 | -0.734665000 | 1.000187000  |
| H  | -5.988279000 | -0.150113000 | 0.336815000  |
| H  | -4.958175000 | 0.942193000  | 1.260397000  |
| C  | -4.906621000 | 1.806445000  | -1.314671000 |
| H  | -5.944842000 | 1.598576000  | -1.582660000 |
| H  | -4.383384000 | 2.149259000  | -2.210225000 |
| H  | -4.900120000 | 2.609767000  | -0.574986000 |
| C  | -2.843460000 | -2.547962000 | -0.915413000 |
| H  | -3.542985000 | -3.256687000 | -1.365987000 |
| H  | -3.137380000 | -2.396311000 | 0.126994000  |
| H  | -1.851670000 | -3.002240000 | -0.924024000 |
| C  | -2.267436000 | -1.507768000 | -3.112530000 |
| H  | -2.912106000 | -2.204009000 | -3.656005000 |
| H  | -1.270472000 | -1.949901000 | -3.037165000 |
| H  | -2.196170000 | -0.586176000 | -3.696561000 |
| H  | -2.883825000 | 1.335278000  | 2.079190000  |
| H  | -1.683697000 | 2.758514000  | -1.778200000 |
| H  | 2.190223000  | 1.374018000  | 2.047162000  |
| H  | 2.556331000  | 2.675143000  | -2.016607000 |
| Pt | 0.020902000  | -0.232737000 | -0.888887000 |
| Cl | -1.952901000 | -1.081201000 | 2.706273000  |
| Cl | -0.246524000 | -3.935224000 | 1.220617000  |
| Cl | 1.870788000  | -1.259678000 | 2.627616000  |
| In | -0.094472000 | -1.530450000 | 1.257071000  |

**2-B1**, T. E. = -1724.768074

|   |              |              |              |
|---|--------------|--------------|--------------|
| C | 2.035587000  | -0.608738000 | -0.597730000 |
| N | -2.947497000 | 0.244412000  | -0.516989000 |
| C | 2.865534000  | -1.812611000 | -1.027193000 |
| N | 2.859183000  | 0.402043000  | -0.433594000 |
| C | 4.305066000  | -1.434913000 | -0.639371000 |
| H | 4.546750000  | -1.881098000 | 0.329458000  |
| H | 5.041707000  | -1.792806000 | -1.361972000 |
| C | 4.334647000  | 0.097502000  | -0.517519000 |
| C | 2.427999000  | 1.772723000  | -0.377315000 |
| C | 2.248920000  | 3.894418000  | 0.739128000  |
| H | 2.374565000  | 4.494435000  | 1.632878000  |
| C | 2.594163000  | 2.545168000  | 0.767168000  |

|   |              |              |              |
|---|--------------|--------------|--------------|
| C | 1.749218000  | 4.468171000  | -0.424513000 |
| H | 1.491681000  | 5.521491000  | -0.442418000 |
| C | 1.567703000  | 3.685796000  | -1.562732000 |
| H | 1.168370000  | 4.124432000  | -2.470425000 |
| C | 1.906226000  | 2.338743000  | -1.539579000 |
| C | 2.428125000  | -3.142571000 | -0.424048000 |
| H | 3.063195000  | -3.943781000 | -0.813280000 |
| H | 1.391184000  | -3.361163000 | -0.688402000 |
| H | 2.509165000  | -3.142166000 | 0.663358000  |
| C | 2.681715000  | -1.894030000 | -2.557319000 |
| H | 3.329311000  | -2.678701000 | -2.957163000 |
| H | 2.930561000  | -0.956997000 | -3.059362000 |
| H | 1.646680000  | -2.142870000 | -2.803305000 |
| C | 5.048583000  | 0.539686000  | 0.757418000  |
| H | 6.058911000  | 0.123759000  | 0.751561000  |
| H | 4.529969000  | 0.165310000  | 1.643423000  |
| H | 5.135725000  | 1.625580000  | 0.823432000  |
| C | 4.948826000  | 0.800662000  | -1.726848000 |
| H | 6.009738000  | 0.547961000  | -1.784668000 |
| H | 4.866437000  | 1.885965000  | -1.632331000 |
| H | 4.475810000  | 0.498345000  | -2.662094000 |
| C | -2.018691000 | -0.638859000 | -0.793501000 |
| C | -2.659937000 | -1.757249000 | -1.608951000 |
| C | -4.046713000 | -1.210610000 | -1.997860000 |
| H | -4.025041000 | -0.849048000 | -3.029481000 |
| H | -4.824688000 | -1.973622000 | -1.933735000 |
| C | -4.335271000 | -0.034058000 | -1.053237000 |
| C | -2.691344000 | 1.494052000  | 0.148277000  |
| C | -3.317724000 | 1.798333000  | 1.352930000  |
| C | -3.090660000 | 3.031206000  | 1.955012000  |
| H | -3.568255000 | 3.257822000  | 2.901112000  |
| C | -2.244230000 | 3.958074000  | 1.355304000  |
| H | -2.069379000 | 4.919032000  | 1.825694000  |
| C | -1.618404000 | 3.646214000  | 0.151812000  |
| H | -0.957189000 | 4.361972000  | -0.319838000 |
| C | -1.839942000 | 2.414668000  | -0.455154000 |
| C | -5.300507000 | -0.415678000 | 0.070124000  |
| H | -4.876935000 | -1.180974000 | 0.724063000  |
| H | -6.214722000 | -0.813550000 | -0.374879000 |
| H | -5.583585000 | 0.447094000  | 0.673513000  |

|    |              |              |              |
|----|--------------|--------------|--------------|
| C  | -4.852148000 | 1.189522000  | -1.803043000 |
| H  | -5.791138000 | 0.930032000  | -2.297225000 |
| H  | -4.139233000 | 1.508917000  | -2.567005000 |
| H  | -5.042599000 | 2.027767000  | -1.129761000 |
| C  | -2.748036000 | -3.016100000 | -0.736426000 |
| H  | -3.240148000 | -3.814815000 | -1.298048000 |
| H  | -3.318315000 | -2.838637000 | 0.178335000  |
| H  | -1.748767000 | -3.351669000 | -0.452842000 |
| C  | -1.822658000 | -2.069694000 | -2.853211000 |
| H  | -2.359636000 | -2.782894000 | -3.485302000 |
| H  | -0.861284000 | -2.507467000 | -2.576226000 |
| H  | -1.635470000 | -1.168296000 | -3.443929000 |
| H  | -3.942224000 | 1.065172000  | 1.844963000  |
| H  | -1.357220000 | 2.160270000  | -1.392632000 |
| H  | 2.986780000  | 2.103362000  | 1.673668000  |
| H  | 1.786500000  | 1.716399000  | -2.420789000 |
| B  | 0.106599000  | -1.047908000 | 1.538766000  |
| C  | -0.278518000 | -2.593052000 | 1.874098000  |
| H  | -1.340338000 | -2.812878000 | 1.707145000  |
| H  | 0.302728000  | -3.365739000 | 1.364708000  |
| C  | -0.970374000 | -0.204174000 | 2.410600000  |
| H  | -0.799610000 | 0.879654000  | 2.452082000  |
| H  | -2.003622000 | -0.369365000 | 2.089070000  |
| C  | 1.539484000  | -0.754670000 | 2.258986000  |
| H  | 1.854432000  | 0.289845000  | 2.169048000  |
| H  | 2.380001000  | -1.377326000 | 1.922205000  |
| C  | 0.151607000  | -1.591625000 | 3.992006000  |
| H  | 0.168419000  | -1.830405000 | 5.055334000  |
| O  | 1.382085000  | -1.004713000 | 3.689206000  |
| O  | -0.029261000 | -2.793419000 | 3.305781000  |
| O  | -0.907043000 | -0.706317000 | 3.788221000  |
| Pt | 0.027952000  | -0.563413000 | -0.553298000 |

**2-B2**, T. E. = -1976.285182

|   |              |              |              |
|---|--------------|--------------|--------------|
| C | 2.035405000  | -0.392621000 | -0.795317000 |
| N | -2.960395000 | 0.340952000  | -0.567509000 |
| C | 2.880424000  | -1.466574000 | -1.470123000 |
| N | 2.835724000  | 0.601054000  | -0.478832000 |

|   |              |              |              |
|---|--------------|--------------|--------------|
| C | 4.320409000  | -1.121799000 | -1.057406000 |
| H | 4.602483000  | -1.726699000 | -0.190788000 |
| H | 5.043985000  | -1.320654000 | -1.850860000 |
| C | 4.314388000  | 0.364670000  | -0.661163000 |
| C | 2.366278000  | 1.920731000  | -0.155250000 |
| C | 2.152394000  | 3.786850000  | 1.345741000  |
| H | 2.287930000  | 4.214585000  | 2.332342000  |
| C | 2.543507000  | 2.471277000  | 1.110042000  |
| C | 1.591646000  | 4.547333000  | 0.325185000  |
| H | 1.298452000  | 5.574431000  | 0.512509000  |
| C | 1.397069000  | 3.984715000  | -0.934515000 |
| H | 0.950422000  | 4.568639000  | -1.731452000 |
| C | 1.785895000  | 2.672863000  | -1.175440000 |
| C | 2.491745000  | -2.900179000 | -1.125787000 |
| H | 3.130113000  | -3.593180000 | -1.681457000 |
| H | 1.451797000  | -3.088661000 | -1.401701000 |
| H | 2.605294000  | -3.111168000 | -0.061949000 |
| C | 2.649070000  | -1.260136000 | -2.981937000 |
| H | 3.300553000  | -1.935737000 | -3.542383000 |
| H | 2.859968000  | -0.238581000 | -3.303166000 |
| H | 1.612649000  | -1.486511000 | -3.242100000 |
| C | 5.060768000  | 0.590176000  | 0.651668000  |
| H | 6.081998000  | 0.218784000  | 0.538274000  |
| H | 4.587186000  | 0.039918000  | 1.468656000  |
| H | 5.117020000  | 1.647785000  | 0.915254000  |
| C | 4.868172000  | 1.295397000  | -1.738720000 |
| H | 5.932782000  | 1.092564000  | -1.872813000 |
| H | 4.759913000  | 2.341718000  | -1.443986000 |
| H | 4.371752000  | 1.154671000  | -2.699672000 |
| C | -2.013238000 | -0.469758000 | -0.973596000 |
| C | -2.602702000 | -1.370132000 | -2.056641000 |
| C | -3.930358000 | -0.691070000 | -2.438620000 |
| H | -3.788071000 | -0.092416000 | -3.342737000 |
| H | -4.721914000 | -1.414110000 | -2.643833000 |
| C | -4.298041000 | 0.234505000  | -1.270861000 |
| C | -2.765761000 | 1.384078000  | 0.403848000  |
| C | -3.491152000 | 1.377823000  | 1.591555000  |
| C | -3.321746000 | 2.409200000  | 2.507908000  |
| H | -3.876784000 | 2.392893000  | 3.438522000  |
| C | -2.430289000 | 3.443254000  | 2.239337000  |

|    |              |              |              |
|----|--------------|--------------|--------------|
| H  | -2.297263000 | 4.245912000  | 2.955608000  |
| C  | -1.702771000 | 3.439010000  | 1.052978000  |
| H  | -1.002418000 | 4.236800000  | 0.840316000  |
| C  | -1.867132000 | 2.410117000  | 0.131089000  |
| C  | -5.369148000 | -0.372725000 | -0.363552000 |
| H  | -5.016991000 | -1.283955000 | 0.123464000  |
| H  | -6.238584000 | -0.626674000 | -0.973384000 |
| H  | -5.703661000 | 0.330014000  | 0.399691000  |
| C  | -4.731185000 | 1.617143000  | -1.748688000 |
| H  | -5.622389000 | 1.513223000  | -2.371875000 |
| H  | -3.945977000 | 2.085747000  | -2.346730000 |
| H  | -4.975048000 | 2.276117000  | -0.912950000 |
| C  | -2.806558000 | -2.774290000 | -1.469287000 |
| H  | -3.298072000 | -3.409079000 | -2.211561000 |
| H  | -3.422969000 | -2.761018000 | -0.567483000 |
| H  | -1.844165000 | -3.221855000 | -1.215117000 |
| C  | -1.670064000 | -1.473668000 | -3.266817000 |
| H  | -2.183166000 | -1.998136000 | -4.078437000 |
| H  | -0.763993000 | -2.030144000 | -3.017967000 |
| H  | -1.380574000 | -0.485054000 | -3.635309000 |
| H  | -4.145803000 | 0.548925000  | 1.825888000  |
| H  | -1.300003000 | 2.396708000  | -0.793504000 |
| H  | 2.978988000  | 1.881187000  | 1.905772000  |
| H  | 1.656234000  | 2.223695000  | -2.155003000 |
| B  | 0.182307000  | -1.274828000 | 1.294939000  |
| C  | -0.248237000 | -2.860062000 | 1.258583000  |
| H  | -1.281316000 | -2.988419000 | 0.919058000  |
| H  | 0.384933000  | -3.499394000 | 0.636905000  |
| C  | -0.902833000 | -0.521643000 | 2.266240000  |
| H  | -0.764365000 | 0.563474000  | 2.344622000  |
| H  | -1.929022000 | -0.699722000 | 1.929065000  |
| C  | 1.675265000  | -1.109952000 | 1.975472000  |
| H  | 1.944638000  | -0.056506000 | 2.108712000  |
| H  | 2.489673000  | -1.579236000 | 1.411158000  |
| H  | 0.265206000  | -2.878123000 | 5.084105000  |
| O  | 1.721361000  | -1.718387000 | 3.315451000  |
| O  | -0.198385000 | -3.436333000 | 2.620287000  |
| O  | -0.835564000 | -1.050173000 | 3.646172000  |
| Pt | 0.039302000  | -0.427726000 | -0.687007000 |
| Si | 0.235544000  | -2.302007000 | 3.737407000  |

**2-B3, T. E. = -2015.579354**

|   |              |              |              |
|---|--------------|--------------|--------------|
| C | -2.024791000 | -0.309192000 | -0.930366000 |
| N | 2.967002000  | -0.720562000 | -0.257988000 |
| C | -2.876545000 | 0.124487000  | -2.119130000 |
| N | -2.820993000 | -0.906491000 | -0.071703000 |
| C | -4.316755000 | 0.089927000  | -1.580380000 |
| H | -4.611010000 | 1.095111000  | -1.265860000 |
| H | -5.036189000 | -0.246730000 | -2.330107000 |
| C | -4.300619000 | -0.843876000 | -0.358777000 |
| C | -2.352361000 | -1.749667000 | 0.994463000  |
| C | -2.138562000 | -2.297626000 | 3.325617000  |
| H | -2.265277000 | -2.023323000 | 4.366376000  |
| C | -2.518319000 | -1.400440000 | 2.330405000  |
| C | -1.605096000 | -3.536659000 | 2.988690000  |
| H | -1.322803000 | -4.235504000 | 3.768336000  |
| C | -1.420214000 | -3.872932000 | 1.649654000  |
| H | -0.993131000 | -4.832506000 | 1.380513000  |
| C | -1.793021000 | -2.979750000 | 0.652672000  |
| C | -2.502895000 | 1.475642000  | -2.718829000 |
| H | -3.147453000 | 1.683609000  | -3.577876000 |
| H | -1.464617000 | 1.468583000  | -3.057295000 |
| H | -2.619138000 | 2.288932000  | -2.001993000 |
| C | -2.640444000 | -0.957576000 | -3.193924000 |
| H | -3.295260000 | -0.765002000 | -4.047855000 |
| H | -2.846079000 | -1.964489000 | -2.826134000 |
| H | -1.605133000 | -0.931163000 | -3.541175000 |
| C | -5.047962000 | -0.228824000 | 0.821820000  |
| H | -6.074766000 | -0.018608000 | 0.512780000  |
| H | -4.583746000 | 0.712137000  | 1.127497000  |
| H | -5.087933000 | -0.904704000 | 1.677813000  |
| C | -4.842388000 | -2.243958000 | -0.642818000 |
| H | -5.908076000 | -2.174341000 | -0.871057000 |
| H | -4.727123000 | -2.891741000 | 0.229271000  |
| H | -4.343233000 | -2.715653000 | -1.490322000 |
| C | 2.027933000  | -0.347311000 | -1.094534000 |
| C | 2.644234000  | -0.281470000 | -2.489985000 |
| C | 4.005229000  | -0.987982000 | -2.345933000 |

|   |              |              |              |
|---|--------------|--------------|--------------|
| H | 3.926080000  | -2.016269000 | -2.709146000 |
| H | 4.791015000  | -0.495695000 | -2.921664000 |
| C | 4.333237000  | -1.004227000 | -0.847034000 |
| C | 2.741908000  | -0.991644000 | 1.137064000  |
| C | 3.415614000  | -0.266340000 | 2.115620000  |
| C | 3.216341000  | -0.570106000 | 3.457497000  |
| H | 3.729049000  | 0.007729000  | 4.217628000  |
| C | 2.348899000  | -1.595158000 | 3.821472000  |
| H | 2.193770000  | -1.830400000 | 4.868230000  |
| C | 1.675039000  | -2.313190000 | 2.838107000  |
| H | 0.998588000  | -3.111760000 | 3.113658000  |
| C | 1.869107000  | -2.014430000 | 1.493526000  |
| C | 5.344622000  | 0.077450000  | -0.463754000 |
| H | 4.949293000  | 1.079697000  | -0.640889000 |
| H | 6.240209000  | -0.050247000 | -1.075426000 |
| H | 5.651785000  | -0.001684000 | 0.579132000  |
| C | 4.817575000  | -2.373309000 | -0.380898000 |
| H | 5.731489000  | -2.627831000 | -0.922370000 |
| H | 4.069393000  | -3.141994000 | -0.589051000 |
| H | 5.040562000  | -2.381927000 | 0.687763000  |
| C | 2.787008000  | 1.189963000  | -2.903230000 |
| H | 3.290277000  | 1.245944000  | -3.872299000 |
| H | 3.370196000  | 1.766311000  | -2.181318000 |
| H | 1.804937000  | 1.657047000  | -2.995638000 |
| C | 1.759451000  | -0.999086000 | -3.512689000 |
| H | 2.279784000  | -1.050376000 | -4.473640000 |
| H | 0.817595000  | -0.466072000 | -3.657778000 |
| H | 1.532383000  | -2.021617000 | -3.196741000 |
| H | 4.050670000  | 0.564395000  | 1.838861000  |
| H | 1.347613000  | -2.566089000 | 0.718801000  |
| H | -2.938470000 | -0.438936000 | 2.595555000  |
| H | -1.671933000 | -3.231663000 | -0.395924000 |
| B | -0.164710000 | 1.684775000  | 0.163812000  |
| C | 0.246600000  | 2.910171000  | -0.848974000 |
| H | 1.291342000  | 2.832274000  | -1.169348000 |
| H | -0.366687000 | 2.995255000  | -1.750799000 |
| C | 0.923804000  | 1.705903000  | 1.386137000  |
| H | 0.771768000  | 0.923231000  | 2.140201000  |
| H | 1.947489000  | 1.606860000  | 1.011079000  |
| C | -1.655090000 | 1.957239000  | 0.811972000  |



|    |              |              |              |
|----|--------------|--------------|--------------|
| H  | -1.915671000 | 1.187992000  | 1.547174000  |
| H  | -2.472964000 | 1.988613000  | 0.081734000  |
| O  | -1.702248000 | 3.242008000  | 1.523390000  |
| O  | 0.131183000  | 4.206739000  | -0.152612000 |
| O  | 0.882768000  | 2.994926000  | 2.104218000  |
| Pt | -0.024791000 | -0.215403000 | -0.864069000 |
| Si | -0.241229000 | 4.019329000  | 1.449611000  |
| C  | -0.289952000 | 5.639280000  | 2.330070000  |
| H  | 0.674943000  | 6.146679000  | 2.266998000  |
| H  | -1.044624000 | 6.298577000  | 1.896234000  |
| H  | -0.529704000 | 5.502448000  | 3.386507000  |

**2-B4**, T. E. = -2435.957681

|   |              |              |              |
|---|--------------|--------------|--------------|
| C | -2.016801000 | -0.636049000 | -0.884049000 |
| N | 2.986457000  | -0.863710000 | -0.114234000 |
| C | -2.834909000 | -0.478591000 | -2.160834000 |
| N | -2.837701000 | -1.020040000 | 0.067197000  |
| C | -4.286482000 | -0.379478000 | -1.663749000 |
| H | -4.571152000 | 0.673894000  | -1.587435000 |
| H | -4.994964000 | -0.866467000 | -2.337370000 |
| C | -4.309818000 | -1.017001000 | -0.264144000 |
| C | -2.396904000 | -1.596559000 | 1.308805000  |
| C | -2.236594000 | -1.593379000 | 3.707678000  |
| H | -2.394262000 | -1.091710000 | 4.655285000  |
| C | -2.603998000 | -0.955497000 | 2.525802000  |
| C | -1.677664000 | -2.865544000 | 3.674682000  |
| H | -1.405459000 | -3.362207000 | 4.599170000  |
| C | -1.460249000 | -3.498075000 | 2.452569000  |
| H | -1.018763000 | -4.487677000 | 2.419606000  |
| C | -1.818522000 | -2.863899000 | 1.269776000  |
| C | -2.435550000 | 0.700613000  | -3.041008000 |
| H | -3.075259000 | 0.723001000  | -3.928280000 |
| H | -1.397409000 | 0.604081000  | -3.366986000 |
| H | -2.543838000 | 1.653764000  | -2.521972000 |
| C | -2.586596000 | -1.777666000 | -2.955296000 |
| H | -3.216355000 | -1.779785000 | -3.848812000 |
| H | -2.813948000 | -2.673267000 | -2.374574000 |
| H | -1.542767000 | -1.837455000 | -3.270645000 |

|   |              |              |              |
|---|--------------|--------------|--------------|
| C | -5.083128000 | -0.149781000 | 0.726525000  |
| H | -6.093530000 | -0.000184000 | 0.338484000  |
| H | -4.613681000 | 0.830677000  | 0.837883000  |
| H | -5.169251000 | -0.621601000 | 1.706907000  |
| C | -4.857080000 | -2.443180000 | -0.241301000 |
| H | -5.916000000 | -2.422858000 | -0.508031000 |
| H | -4.770297000 | -2.879907000 | 0.756305000  |
| H | -4.340954000 | -3.094026000 | -0.947986000 |
| C | 2.040005000  | -0.698246000 | -1.005955000 |
| C | 2.649655000  | -0.915894000 | -2.388696000 |
| C | 4.045464000  | -1.505438000 | -2.107690000 |
| H | 4.020269000  | -2.590482000 | -2.240243000 |
| H | 4.805601000  | -1.108776000 | -2.783008000 |
| C | 4.369559000  | -1.182243000 | -0.642762000 |
| C | 2.756240000  | -0.877128000 | 1.306472000  |
| C | 3.394305000  | 0.037370000  | 2.140232000  |
| C | 3.180139000  | -0.016555000 | 3.513006000  |
| H | 3.663497000  | 0.709375000  | 4.156799000  |
| C | 2.337473000  | -0.983298000 | 4.053414000  |
| H | 2.172324000  | -1.023151000 | 5.124213000  |
| C | 1.702683000  | -1.894245000 | 3.214425000  |
| H | 1.044732000  | -2.648829000 | 3.626366000  |
| C | 1.910193000  | -1.844407000 | 1.839511000  |
| C | 5.303551000  | 0.022699000  | -0.510231000 |
| H | 4.840506000  | 0.935139000  | -0.891627000 |
| H | 6.206857000  | -0.172038000 | -1.092410000 |
| H | 5.613435000  | 0.188447000  | 0.521663000  |
| C | 4.943119000  | -2.385228000 | 0.098044000  |
| H | 5.878010000  | -2.682287000 | -0.382941000 |
| H | 4.253282000  | -3.231864000 | 0.060275000  |
| H | 5.157242000  | -2.154138000 | 1.143425000  |
| C | 2.715071000  | 0.425143000  | -3.131243000 |
| H | 3.184061000  | 0.276333000  | -4.107586000 |
| H | 3.296490000  | 1.170457000  | -2.583583000 |
| H | 1.710776000  | 0.823746000  | -3.285730000 |
| C | 1.798142000  | -1.894660000 | -3.205093000 |
| H | 2.330388000  | -2.159028000 | -4.123584000 |
| H | 0.841370000  | -1.447502000 | -3.481715000 |
| H | 1.605685000  | -2.817807000 | -2.650537000 |
| H | 4.012458000  | 0.820347000  | 1.721801000  |

|    |              |              |              |
|----|--------------|--------------|--------------|
| H  | 1.420182000  | -2.550585000 | 1.177450000  |
| H  | -3.045350000 | 0.031770000  | 2.557404000  |
| H  | -1.670629000 | -3.347710000 | 0.309378000  |
| B  | -0.140628000 | 1.527717000  | -0.211947000 |
| C  | 0.269277000  | 2.526433000  | -1.453812000 |
| H  | 1.322444000  | 2.418797000  | -1.733485000 |
| H  | -0.330145000 | 2.417925000  | -2.360396000 |
| C  | 0.951919000  | 1.804966000  | 0.980776000  |
| H  | 0.794877000  | 1.213856000  | 1.890144000  |
| H  | 1.973511000  | 1.628061000  | 0.636081000  |
| C  | -1.634214000 | 1.931830000  | 0.364947000  |
| H  | -1.909685000 | 1.315978000  | 1.224761000  |
| H  | -2.441765000 | 1.851318000  | -0.371175000 |
| O  | -1.680391000 | 3.332174000  | 0.849930000  |
| O  | 0.108343000  | 3.949111000  | -1.044519000 |
| O  | 0.932461000  | 3.231269000  | 1.405590000  |
| Pt | -0.012527000 | -0.534823000 | -0.813237000 |
| Si | -0.223322000 | 4.019003000  | 0.556545000  |
| Cl | -0.280006000 | 5.981157000  | 1.149046000  |

**2-B5**, T. E. = -1724.889912

|   |              |              |              |
|---|--------------|--------------|--------------|
| C | 2.045738000  | -0.569828000 | -0.706249000 |
| N | -2.812614000 | 0.385965000  | -0.446953000 |
| C | 2.952144000  | -1.754377000 | -1.007765000 |
| N | 2.812642000  | 0.454422000  | -0.428720000 |
| C | 4.311041000  | -1.352959000 | -0.405817000 |
| H | 4.425873000  | -1.823595000 | 0.574195000  |
| H | 5.152262000  | -1.669389000 | -1.026964000 |
| C | 4.279087000  | 0.175487000  | -0.236943000 |
| C | 2.325547000  | 1.783614000  | -0.177718000 |
| C | 1.395656000  | 3.401476000  | 1.329674000  |
| H | 0.952793000  | 3.646352000  | 2.288463000  |
| C | 1.765159000  | 2.089304000  | 1.060504000  |
| C | 1.575629000  | 4.396695000  | 0.370531000  |
| H | 1.283580000  | 5.418529000  | 0.587769000  |
| C | 2.101333000  | 4.074400000  | -0.875134000 |
| H | 2.220630000  | 4.839816000  | -1.633860000 |
| C | 2.477670000  | 2.762031000  | -1.153762000 |

|   |              |              |              |
|---|--------------|--------------|--------------|
| C | 2.446034000  | -3.075193000 | -0.439335000 |
| H | 3.159624000  | -3.869633000 | -0.681415000 |
| H | 1.472140000  | -3.329988000 | -0.859425000 |
| H | 2.325107000  | -3.013283000 | 0.642171000  |
| C | 3.007916000  | -1.855219000 | -2.543290000 |
| H | 3.674563000  | -2.672413000 | -2.831858000 |
| H | 3.375233000  | -0.934173000 | -3.002326000 |
| H | 2.013577000  | -2.062113000 | -2.947528000 |
| C | 4.687020000  | 0.598806000  | 1.172530000  |
| H | 5.700241000  | 0.242097000  | 1.372663000  |
| H | 4.008262000  | 0.161052000  | 1.908607000  |
| H | 4.678600000  | 1.685050000  | 1.287714000  |
| C | 5.124652000  | 0.908833000  | -1.276265000 |
| H | 6.171676000  | 0.627335000  | -1.142887000 |
| H | 5.053741000  | 1.991657000  | -1.157672000 |
| H | 4.829630000  | 0.647528000  | -2.294616000 |
| C | -2.017003000 | -0.582439000 | -0.822748000 |
| C | -2.881135000 | -1.722927000 | -1.346668000 |
| C | -4.288929000 | -1.106883000 | -1.480478000 |
| H | -4.472184000 | -0.818253000 | -2.519584000 |
| H | -5.076218000 | -1.804430000 | -1.187395000 |
| C | -4.294100000 | 0.150186000  | -0.598899000 |
| C | -2.370749000 | 1.661018000  | 0.047543000  |
| C | -2.492086000 | 1.976643000  | 1.395684000  |
| C | -2.210917000 | 3.272980000  | 1.819589000  |
| H | -2.303632000 | 3.523252000  | 2.870582000  |
| C | -1.804048000 | 4.239094000  | 0.905424000  |
| H | -1.584675000 | 5.246647000  | 1.241770000  |
| C | -1.646245000 | 3.903271000  | -0.436422000 |
| H | -1.298117000 | 4.644184000  | -1.147258000 |
| C | -1.931918000 | 2.613724000  | -0.868218000 |
| C | -4.942518000 | -0.077779000 | 0.767121000  |
| H | -4.430014000 | -0.859052000 | 1.330583000  |
| H | -5.981442000 | -0.382016000 | 0.620757000  |
| H | -4.945286000 | 0.836637000  | 1.362653000  |
| C | -4.951699000 | 1.337440000  | -1.295620000 |
| H | -5.993811000 | 1.088296000  | -1.509604000 |
| H | -4.452399000 | 1.561916000  | -2.240994000 |
| H | -4.937522000 | 2.233489000  | -0.671290000 |
| C | -2.852310000 | -2.878387000 | -0.337361000 |

|    |              |              |              |
|----|--------------|--------------|--------------|
| H  | -3.491934000 | -3.687265000 | -0.703306000 |
| H  | -3.216765000 | -2.565409000 | 0.643553000  |
| H  | -1.836063000 | -3.243538000 | -0.195446000 |
| C  | -2.349551000 | -2.215773000 | -2.694078000 |
| H  | -3.027319000 | -2.969643000 | -3.105766000 |
| H  | -1.360165000 | -2.663584000 | -2.577335000 |
| H  | -2.274166000 | -1.397341000 | -3.415701000 |
| H  | -2.772002000 | 1.204474000  | 2.099090000  |
| H  | -1.833394000 | 2.339426000  | -1.913143000 |
| H  | 1.621693000  | 1.286185000  | 1.774977000  |
| H  | 2.886483000  | 2.496363000  | -2.122400000 |
| B  | 0.025932000  | -1.268154000 | 1.209175000  |
| O  | -1.066226000 | -0.627658000 | 1.962182000  |
| O  | -0.157344000 | -2.727214000 | 1.228327000  |
| O  | 1.320762000  | -0.945764000 | 1.860706000  |
| C  | -1.231550000 | -1.267372000 | 3.218010000  |
| C  | 0.087099000  | -3.235919000 | 2.527459000  |
| C  | 1.235977000  | -1.182299000 | 3.257249000  |
| H  | -1.399087000 | -0.501624000 | 3.986291000  |
| H  | -2.113700000 | -1.926274000 | 3.201629000  |
| H  | 1.072619000  | -3.727279000 | 2.571742000  |
| H  | -0.673577000 | -3.992224000 | 2.760234000  |
| H  | 2.162634000  | -1.665769000 | 3.591944000  |
| H  | 1.137399000  | -0.230491000 | 3.803502000  |
| C  | 0.027722000  | -2.082368000 | 3.534578000  |
| H  | 0.024033000  | -2.445491000 | 4.566549000  |
| Pt | 0.021534000  | -0.550187000 | -0.778773000 |

**2-B6**, T. E. = -2693.774978

|   |              |              |              |
|---|--------------|--------------|--------------|
| C | 1.916731000  | -0.101293000 | -1.001788000 |
| N | -2.849004000 | 0.905374000  | -0.438368000 |
| C | 2.700938000  | -0.928929000 | -2.014270000 |
| N | 2.743647000  | 0.781789000  | -0.497272000 |
| C | 4.164988000  | -0.734410000 | -1.588963000 |
| H | 4.458460000  | -1.564807000 | -0.941149000 |
| H | 4.847231000  | -0.715194000 | -2.441676000 |
| C | 4.212685000  | 0.578311000  | -0.792982000 |
| C | 2.368312000  | 1.909699000  | 0.317582000  |

|   |              |              |              |
|---|--------------|--------------|--------------|
| C | 1.928280000  | 2.894757000  | 2.460853000  |
| H | 1.763146000  | 2.784916000  | 3.526759000  |
| C | 2.163883000  | 1.763590000  | 1.685323000  |
| C | 1.914533000  | 4.158884000  | 1.878611000  |
| H | 1.743815000  | 5.037135000  | 2.491426000  |
| C | 2.095633000  | 4.292703000  | 0.506070000  |
| H | 2.060728000  | 5.272342000  | 0.042557000  |
| C | 2.312231000  | 3.166172000  | -0.280331000 |
| C | 2.323669000  | -2.401753000 | -2.089653000 |
| H | 2.975779000  | -2.899176000 | -2.814887000 |
| H | 1.287827000  | -2.527690000 | -2.408190000 |
| H | 2.429079000  | -2.889145000 | -1.120967000 |
| C | 2.395095000  | -0.276095000 | -3.378280000 |
| H | 2.985638000  | -0.768598000 | -4.155324000 |
| H | 2.626193000  | 0.790974000  | -3.393643000 |
| H | 1.336919000  | -0.395525000 | -3.625394000 |
| C | 4.960035000  | 0.422624000  | 0.529328000  |
| H | 5.986502000  | 0.111583000  | 0.320873000  |
| H | 4.482246000  | -0.337654000 | 1.151249000  |
| H | 4.995818000  | 1.362614000  | 1.084704000  |
| C | 4.805318000  | 1.739587000  | -1.589416000 |
| H | 5.844798000  | 1.500017000  | -1.824474000 |
| H | 4.801536000  | 2.665030000  | -1.011605000 |
| H | 4.278801000  | 1.909457000  | -2.529801000 |
| C | -2.162728000 | -0.160503000 | -0.769914000 |
| C | -3.121016000 | -1.120165000 | -1.471886000 |
| C | -4.320581000 | -0.227607000 | -1.850339000 |
| H | -4.201532000 | 0.141287000  | -2.873379000 |
| H | -5.268757000 | -0.766001000 | -1.797933000 |
| C | -4.289094000 | 0.962545000  | -0.881232000 |
| C | -2.318637000 | 1.999777000  | 0.327290000  |
| C | -2.500568000 | 2.014667000  | 1.704705000  |
| C | -2.051350000 | 3.108977000  | 2.438683000  |
| H | -2.183600000 | 3.122645000  | 3.514372000  |
| C | -1.434320000 | 4.176093000  | 1.794999000  |
| H | -1.088352000 | 5.028361000  | 2.368814000  |
| C | -1.243684000 | 4.143951000  | 0.415679000  |
| H | -0.747556000 | 4.966908000  | -0.085283000 |
| C | -1.685861000 | 3.054122000  | -0.323466000 |
| C | -5.224576000 | 0.824351000  | 0.320602000  |

|    |              |              |              |
|----|--------------|--------------|--------------|
| H  | -5.003608000 | -0.062582000 | 0.914390000  |
| H  | -6.254591000 | 0.753978000  | -0.035550000 |
| H  | -5.155738000 | 1.698742000  | 0.971337000  |
| C  | -4.567476000 | 2.281866000  | -1.596149000 |
| H  | -5.572520000 | 2.240846000  | -2.022728000 |
| H  | -3.858554000 | 2.444697000  | -2.410801000 |
| H  | -4.523025000 | 3.133094000  | -0.913923000 |
| C  | -3.563665000 | -2.222605000 | -0.494067000 |
| H  | -4.268563000 | -2.879465000 | -1.013186000 |
| H  | -4.061531000 | -1.811753000 | 0.384045000  |
| H  | -2.714096000 | -2.810017000 | -0.153283000 |
| C  | -2.461514000 | -1.757389000 | -2.693928000 |
| H  | -3.186003000 | -2.381229000 | -3.225570000 |
| H  | -1.619110000 | -2.383667000 | -2.391536000 |
| H  | -2.092488000 | -0.997103000 | -3.388220000 |
| H  | -2.974067000 | 1.170326000  | 2.190968000  |
| H  | -1.548187000 | 3.014153000  | -1.398846000 |
| H  | 2.192937000  | 0.770286000  | 2.117955000  |
| H  | 2.447308000  | 3.257768000  | -1.352489000 |
| B  | 0.105912000  | -1.696156000 | 0.703849000  |
| C  | -1.111549000 | -2.997015000 | 2.931295000  |
| C  | 0.311022000  | -4.465049000 | 1.405062000  |
| C  | 1.431982000  | -2.824274000 | 2.984782000  |
| H  | -1.305611000 | -2.835124000 | 3.993407000  |
| H  | -1.923937000 | -3.607379000 | 2.527164000  |
| H  | 1.341664000  | -4.784142000 | 1.228036000  |
| H  | -0.319111000 | -5.356641000 | 1.422430000  |
| H  | 2.311876000  | -3.427635000 | 3.216673000  |
| H  | 1.239021000  | -2.166674000 | 3.835695000  |
| C  | 0.222410000  | -3.735407000 | 2.750513000  |
| H  | 0.259520000  | -4.508401000 | 3.529827000  |
| Pt | -0.088063000 | -0.197643000 | -0.724284000 |
| S  | -1.160367000 | -1.336933000 | 2.133807000  |
| S  | -0.266416000 | -3.458378000 | -0.021844000 |
| S  | 1.878270000  | -1.795681000 | 1.526366000  |
